1 **TITLE**

2 Mitochondrial GTP Metabolism Regulates Reproductive Aging

3

4 **AUTHORS AND AFFILIATIONS**

5 Yi-Tang Lee<sup>1,2,3</sup>, Marzia Savini<sup>2,3,4</sup>, Tao Chen<sup>5</sup>, Jin Yang<sup>6</sup>, Qian Zhao<sup>5</sup>, Lang Ding<sup>5,7</sup>, Shihong  
6 Max Gao<sup>4,5</sup>, Mumine Senturk<sup>2,8</sup>, Jessica Sowa<sup>9</sup>, Jue D. Wang<sup>6</sup>, Meng C. Wang<sup>5,8\*</sup>

7

8 1 Integrative Program of Molecular and Biochemical Sciences, Baylor College of Medicine,  
9 Houston, TX 77030, USA

10 2 Huffington Center on Aging, Baylor College of Medicine, Houston, TX 77030, USA

11 3 Department of Molecular and Human Genetics, Baylor College of Medicine, Houston, TX  
12 77030, USA

13 4 Graduate Program in Developmental Biology, Baylor College of Medicine, Houston, TX  
14 77030, USA

15 5 Howard Hughes Medical Institute, Janelia Research Campus, Ashburn, VA 20147, USA

16 6 Department of Bacteriology, University of Wisconsin-Madison, Madison, Wisconsin 53715,  
17 USA

18 7 Graduate Program in Chemical, Physical & Structural Biology, Graduate School of Biomedical  
19 Science, Baylor College of Medicine, Houston, TX 77030, USA

20 8 Howard Hughes Medical Institute, Baylor College of Medicine, Houston, TX 77030, USA

21 9 Department of Biology, West Chester University, West Chester, PA 19383, USA

22 \*Correspondence: [mengwang@janelia.hhmi.org](mailto:mengwang@janelia.hhmi.org) (M.C.W)

23

24

25

26

27

28

29

30

31

32

33

34

35 **SUMMARY**

36 Healthy mitochondria are critical for reproduction. During aging, both reproductive fitness and  
37 mitochondrial homeostasis decline. Mitochondrial metabolism and dynamics are key factors in  
38 supporting mitochondrial homeostasis. However, how they are coupled to control reproductive  
39 health remains unclear. We report that mitochondrial GTP metabolism acts through  
40 mitochondrial dynamics factors to regulate reproductive aging. We discovered that germline-  
41 only inactivation of GTP- but not ATP-specific succinyl-CoA synthetase (SCS), promotes  
42 reproductive longevity in *Caenorhabditis elegans*. We further revealed an age-associated  
43 increase in mitochondrial clustering surrounding oocyte nuclei, which is attenuated by the GTP-  
44 specific SCS inactivation. Germline-only induction of mitochondrial fission factors sufficiently  
45 promotes mitochondrial dispersion and reproductive longevity. Moreover, we discovered that  
46 bacterial inputs affect mitochondrial GTP and dynamics factors to modulate reproductive aging.  
47 These results demonstrate the significance of mitochondrial GTP metabolism in regulating  
48 oocyte mitochondrial homeostasis and reproductive longevity and reveal mitochondrial fission  
49 induction as an effective strategy to improve reproductive health.

50

51

52

53

54

55

56

57

58

59

60

61

62

63

64

65

66

## 67 INTRODUCTION

68 As one of the earliest signs of age-associated decline, reproductive senescence has a strong  
69 impact on society due to the trend of increased average maternal age at first birth<sup>1</sup>. Aged  
70 women exhibit decreased fertility and increased rates of birth defects and miscarriages<sup>2</sup>. It is  
71 estimated that fertility decline occurs on an average of 10 years prior to menopause, and an  
72 age-associated decrease in oocyte quality is the major cause for this decline<sup>3</sup>. Diverse factors  
73 can influence oocyte quality, and one of the main contributors is mitochondrial activity<sup>4</sup>. Oocytes  
74 have the largest number of mitochondria among all the cells in an organism<sup>5</sup>. Changes in  
75 mitochondrial ATP production, membrane potential, and DNA copy numbers have been  
76 reported to influence oocyte development, maturation and fertility<sup>4,6-8</sup>. Meanwhile, mitochondria  
77 exhibit highly dynamic morphology and constantly undergo organellar fission and fusion, leading  
78 to changes in their shape, size, and distribution<sup>9</sup>. Specific types of protein machinery are  
79 required to maintain mitochondrial fission-fusion dynamics, including the mitochondrial fission  
80 GTPase DRP1, mitochondrial outer membrane fusion GTPases MFN1 and MFN2, and  
81 mitochondrial inner membrane fusion GTPase OPA1<sup>9</sup>. These regulators of mitochondrial  
82 dynamics also modulate mitochondrial distribution within the cell, especially in the oocyte. In  
83 mice with Drp1 knockout, the oocyte mitochondrial network is aggregated toward the  
84 perinuclear region<sup>10</sup>. Similarly, in mouse oocytes overexpressing Mfn1 or Mfn2, the  
85 mitochondrial network also exhibits perinuclear accumulation without increasing tubular  
86 elongation<sup>11</sup>. Mitochondrial dynamics factors have been linked with oocyte development and  
87 maturation<sup>10,12,13</sup>. Drp1 knockout in oocytes results in abnormal follicular maturation, defective  
88 meiotic resumption, and fertility decline in mice<sup>10</sup>. Oocyte-specific knockout of mouse Mfn1  
89 causes defective folliculogenesis and apoptotic cell loss, leading to complete infertility<sup>12,13</sup>.  
90 These findings indicate the importance of mitochondrial dynamics factors in regulating oocyte  
91 quality during development.

92  
93 On the other hand, in *C. elegans*, mitochondrial dynamics factors have been linked with the  
94 regulation of somatic aging. Selectively overexpressing the *C. elegans* DRP1 homolog *drp-1* in  
95 the intestine prolongs lifespan<sup>14</sup>, and whole-body knockout of *drp-1* together with *fzo-1*, the *C.*  
96 *elegans* MFN homolog, leads to lifespan extension in *C. elegans*<sup>15</sup>. In addition, the lifespan-  
97 extending effect associated with DRP1 overexpression has been also reported in *Drosophila*<sup>16</sup>.  
98 Besides being a well-established model organism for studying somatic aging, *C. elegans* share  
99 similarities with humans regarding reproductive aging. Like in humans, the reproductive time  
100 window in *C. elegans* takes approximately one-third of its total lifespan, and with the increase of

101 age, both oocyte quality and fertility decline<sup>17,18</sup>. Not only genetic factors but also environmental  
102 cues including bacterial species contained in the diet are known to regulate reproductive aging  
103 in *C. elegans*<sup>19</sup>. Upon their exposure to different bacteria, worms exhibit a distinct reproductive  
104 lifespan (RLS), which can be further modified by genetic manipulations<sup>19</sup>. Moreover, through a  
105 full-genome RNA interference (RNAi) screen, we have identified several mitochondrial genes as  
106 regulators of reproductive aging in *C. elegans*<sup>20</sup>, which includes two subunits of Succinyl-CoA  
107 Synthetase (SCS).

108  
109 SCS is a key mitochondrial enzyme in the TCA cycle converting succinyl-CoA to succinate with  
110 a production of GTP or ATP<sup>21</sup>. A functional SCS enzyme comprises one alpha subunit and one  
111 beta subunit. Two interchangeable beta subunits of SCS determine the GTP/ATP specificity by  
112 forming a complex with the constant alpha subunit<sup>22,23</sup>. Results from immunoblotting analyses in  
113 mammals reveal that SCS beta subunits exhibit heterogeneous expression patterns across  
114 different tissues<sup>24</sup>. In humans, kidney and liver have a relatively high level of the GTP-specific  
115 beta subunit in comparison to the high level of the ATP-specific beta subunit in heart, testis, and  
116 brain<sup>24</sup>. In mitochondria, ATP is primarily synthesized through oxidative phosphorylation, while  
117 GTP is predominantly generated by the GTP-specific isoform of SCS in the TCA cycle. Thus, it  
118 is predicted that the GTP-specific beta subunit of SCS acts as a metabolic sensor of the TCA-  
119 cycle flux and couples it with glucose homeostasis<sup>25</sup>. Consistently, the GTP-specific beta  
120 subunit of SCS in pancreatic beta cells is essential for glucose-sensing and insulin  
121 secretion<sup>25,26</sup>.

122  
123 In this study, we discovered that the GTP-specific SCS in the germline regulates reproductive  
124 aging through tuning mitochondrial positioning in the oocyte, and that increasing mitochondrial  
125 fission selectively in the germline prevents age-associated perinuclear accumulation of  
126 mitochondria in the oocyte and promotes reproductive longevity in *C. elegans*. We found that  
127 knockdown of *sucg-1*, encoding the GTP-specific beta subunit of SCS, extends RLS, improves  
128 late fertility, and attenuates an age-associated increase in oocyte mitochondrial clustering  
129 around the nucleus. Germline-specific depletion of the DRP-1 protein suppressed the  
130 reproductive-longevity-promoting effect caused by the *sucg-1* knockdown. Conversely,  
131 germline-specific overexpression of *drp-1* or germline-specific knockdown of *eat-3*, the *C.*  
132 *elegans* OPA1 homolog, was sufficient to promote reproductive longevity and attenuate the age-  
133 associated perinuclear accumulation of oocyte mitochondria. Furthermore, we found that the  
134 regulation of reproductive aging by the GTP-specific SCS and mitochondrial dynamics factors

135 responds to the level of vitamin B12 in bacteria. Taken together, our findings reveal a previously  
136 unknown function of mitochondrial GTP metabolism in the germline and its significance in the  
137 regulation of mitochondrial homeostasis and oocyte quality during aging. This work also  
138 suggests that fine-tuning mitochondrial distribution selectively in the reproductive system  
139 through either genetic manipulation or dietary intervention is an effective strategy to promote  
140 reproductive longevity.

141

## 142 **RESULTS**

143

### 144 **GTP-specific SCS regulates reproductive aging**

145 In the genome-wide RNAi screen searching for regulators of reproductive longevity, *suc1-2* and  
146 *sucg-1*, which encode the alpha and beta subunit of SCS respectively, were identified<sup>20</sup>. SCS  
147 catalyzes an essential step in the TCA cycle converting succinyl-CoA to succinate (**Figure 1A**).  
148 To further understand the role SCS plays in regulating reproductive longevity, we first performed  
149 longitudinal studies and found that inactivating either *suc1-2* or *sucg-1* by RNAi results in not  
150 only RLS extension, but also improved fertility in aged hermaphrodites (late fertility) (**Figures**  
151 **1B-D, Supplementary Table 1**). As the age of control hermaphrodites increased from 1-day-old  
152 to 7-day-old and 9-day-old, the percentage of individuals capable of reproducing was decreased  
153 from 100% to less than 50% and 30% respectively when they were mated with 2-day-old young  
154 males (**Figure 1D**). With *sucg-1* or *suc1-2* RNAi knockdown, the percentage of the aged  
155 hermaphrodites capable of reproducing was increased to more than 70% or 90% at day 7, and  
156 more than 50% or 70% at day 9, respectively (**Figure 1D**).

157

158 It is known that SCS forms either an ATP- or GTP-specific heterodimer enzyme complex, which  
159 produces ATP or GTP alongside the conversion of succinyl-CoA to succinate, respectively  
160 (**Figure 1A**). This specificity for ATP or GTP production relies on distinct beta subunits, but not  
161 on the constant alpha subunit<sup>22</sup>. In *C. elegans*, *sucg-1* encodes the GTP-specific beta subunit  
162 and *suca-1* encodes the ATP-specific beta subunit. We found that unlike *sucg-1*, the RNAi  
163 knockdown of *suca-1* shows no RLS extension or improvement of late fertility (**Figures 1D and**  
164 **1E, Supplementary Table 1**). These results suggest that the SCS complex formed by the alpha  
165 subunit encoded by *suc1-2* and the beta subunit encoded by *sucg-1* is specifically involved in  
166 regulating RLS and late fertility. Given that SUCG-1 is responsible for converting GDP to GTP in  
167 mitochondria, these results indicate a possible role of mitochondrial GTP metabolism in  
168 modulating reproductive aging.

169

170 **GTP-specific SCS functions in the germline to regulate mitochondria and reproductive**  
171 **aging**

172 To understand how the GTP-specific SCS regulates reproductive aging, we first examined the  
173 expression pattern of *sucg-1* using a CRISPR knock-in line in which the endogenous SUCG-1  
174 was tagged with eGFP at the C terminus. Using this line, we detected SUCG-1::eGFP  
175 expression predominantly in the germline, with weaker signals in the pharynx, intestine,  
176 hypodermis, and muscle (**Figure 2A**). Using CRISPR knock-in, the endogenous SUCA-1 was  
177 also tagged with eGFP at the C terminus, which revealed the predominant expression of *suca-1*  
178 in the pharynx, neuron, intestine, hypodermis, and muscle but a very weak signal in the  
179 germline (**Figure S1A**). Moreover, we found that the GFP intensity in the germline of the SUCG-  
180 1::eGFP worms is increased at day-5 adulthood when compared to day-1 adulthood (**Figures**  
181 **2B and 2C**), suggesting an elevation of germline SUCG-1 levels with aging. These findings  
182 suggest that mitochondrial SUCG-1 may function in the germline to regulate reproductive aging  
183 cell-autonomously.

184

185 To further confirm this cell-autonomous regulation, we utilized a tissue-specific RNAi strain, in  
186 which the expression of the RNAi-induced silencing complex component RDE-1 is restored  
187 specifically in the germline of the *rde-1* null mutant<sup>29</sup>. We knocked down either *sucg-1* or *sucl-2*  
188 by RNAi selectively in the germline and found that germline-specific knockdown of *sucg-1*  
189 extends RLS compared to control worms treated with the empty vector (**Figure 2D**,  
190 **Supplementary Table 1**). Germline-specific knockdown of *sucl-2* led to similar RLS extending  
191 effects (**Figure 2E, Supplementary Table 1**). These results suggest that *sucg-1* and *sucl-2* act  
192 in the germline to regulate reproductive longevity. We also measured the progeny number in  
193 those worms with extended RLS and observed 7% or 11% reduction associated with the *sucg-1*  
194 or *sucl-2* germline-specific RNAi knockdown, respectively (**Figures S1B and S1C**). The  
195 decrease in the progeny number has been previously observed in other interventions leading to  
196 RLS extension, such as the loss-of-function mutant of *daf-2*, *eat-2*, and *sma-2*<sup>18,30–32</sup>. In addition,  
197 the *daf-2* and the *eat-2* mutants not only prolong RLS but also extend lifespan<sup>33,34</sup>. We found  
198 that the whole-body RNAi knockdown of either *sucg-1* or *sucl-2* leads to a mild lifespan  
199 extension (~15%), but the *suca-1* knockdown does not affect lifespan (**Figure S1D**,  
200 **Supplementary Table 2**). Upon germline-specific RNAi knockdown, the result was similar  
201 except that *sucg-1* showed no lifespan extension in one out of three trials, and *suca-1* slightly  
202 shortened lifespan in one out of three trials (**Figure S1E, Supplementary Table 2**).

203

204 Both GTP- and ATP-specific SCS isoforms function in the TCA cycle to catalyze succinate  
205 production from succinyl-CoA, and their loss both lead to increased succinyl-CoA and  
206 decreased succinate levels. However, the RNAi knockdown of *suca-1* and *sucg-1* exert  
207 distinctive effects on RLS, suggesting that the change in either succinate or succinyl-CoA level  
208 is unlikely linked with the regulation of reproductive aging. In supporting of this idea, we found  
209 that dietary supplementation of sodium succinate or succinic acid does not alter RLS (**Figure**  
210 **S1F, Supplementary Table 1**). Additionally, germline-specific knockdown of *ogdh-1*, which  
211 encodes a subunit of  $\alpha$ -ketoglutarate dehydrogenase (upstream of SCS), led to sterile  
212 phenotype in worms. Meanwhile, germline-specific knockdown of *mev-1* or *sdhb-1* encoding  
213 subunits of succinate dehydrogenase (downstream of SCS) resulted in a very short reproductive  
214 time window (**Figure S1G, Supplementary Table 1**). Together, these results demonstrate that  
215 GTP-specific SCS functions in the germline to regulate reproductive aging, and this regulatory  
216 effect is not associated with changes in succinate or succinyl-CoA levels.

217

218 We further confirmed mitochondrial localization of SUCG-1 by crossing the SUCG-1::eGFP line  
219 with the transgenic strain that expresses mKate2 tagged TOMM-20 on the outer mitochondrial  
220 membrane in the germline<sup>35</sup>. We observed co-localization between SUCG-1::eGFP and TOMM-  
221 20::mKate2 (**Figure 2F**). Thus, like its human homolog SUCLG1, SUCG-1 resides in  
222 mitochondria. Next, we tested whether SUCG-1 regulates reproductive longevity through  
223 affecting mitochondrial GTP (mtGTP) levels in the germline. To this end, we have made a  
224 transgenic strain expressing mitochondrial-matrix-targeting-sequence tagged *ndk-1* specifically  
225 in the germline. *ndk-1* encodes the nucleoside diphosphate kinase that catalyzes the synthesis  
226 of GTP from ATP, and thus its expression would increase GTP levels<sup>36</sup>. We found that *ndk-1*  
227 overexpression in germline mitochondria is sufficient to suppress the RLS extension caused by  
228 *sucg-1* knockdown (**Figure 2G, Supplementary Table 1**), suggesting that GTP-specific SCS  
229 regulates reproductive aging through modulating mtGTP levels in the germline.

230

231 Next, to test whether the loss of SCS affects germline mitochondrial homeostasis, we utilized  
232 the transgenic strain expressing GFP tagged TOMM-20 in the germline<sup>35</sup> and imaged  
233 mitochondrial morphology at day 1 and day 5 of adulthood. We found that mitochondrial  
234 fragmentation and tubulation morphology exhibits high variations between individuals of the  
235 same genotype, which prevented us to draw an explicit conclusion. On the other hand, we  
236 observed that the mitochondrial network of oocytes increases perinuclear distribution in day 5

237 aged worms, while being largely dispersed in day 1 young worms (**Figure 2H**). We wrote an  
238 imaging analysis script to quantify mitochondrial distribution. This method first divided oocyte  
239 cells into five rings, with the first ring being the closest and the fifth ring being the most distant  
240 from the nucleus, and then calculated the percentage of mitochondrial GFP signal intensity in  
241 each ring among all five (**Figure S2A**). Next, based on the percentage of the signal intensity  
242 within ring 1, the images of oocyte mitochondria were categorized into three categories –  
243 dispersed, intermediate, and perinuclear. The quantification results using this method showed  
244 that mitochondrial GFP signals are evenly distributed throughout the five rings in the oocyte of  
245 day 1 worms (**Figure S2B**), while in the oocyte of day 5 worms, the percentage of the  
246 mitochondrial GFP signal derived from ring 1 is increased (**Figures S2B and S2C**). Further  
247 categorization analysis revealed that the perinuclear distribution of oocyte mitochondria is  
248 increased in day 5 worms (**Figure 2I**). To test whether this change in mitochondrial distribution  
249 is associated with a decrease in mitochondrial content, we dissected germline and measured  
250 mitochondrial DNA (mtDNA) levels using quantitative PCR (qPCR). The result showed that the  
251 mtDNA level is 60% higher in the germline of day 5 aged worms than that in day 1 young worms  
252 (**Figure S2D**), indicating that the age-associated perinuclear accumulation of oocyte  
253 mitochondria is unlikely due to a decline in mitochondrial numbers.

254  
255 Interestingly, we found that RNAi knockdown of *sucg-1* or *sucl-2* suppresses the age-associated  
256 increase in mitochondrial clustering around the nucleus, while RNAi knockdown of *suca-1*  
257 shows no such effect (**Figures 2J and S3A**), which are consistent with their effects on RLS and  
258 late fertility (**Figures 1B-E**). Furthermore, the qPCR result showed that *sucg-1*, *sucl-2*, or *suca-1*  
259 germline-specific RNAi knockdown does not affect the germline mtDNA level at day 1 but leads  
260 to ~30% increase at day 5 (**Figure S2E**). Thus, the loss of either SCS isoform increases  
261 mitochondrial content in the germline with aging, which is not specific to *sucg-1* knockdown and  
262 thus unlikely related with its effect on oocyte mitochondria positioning. Together, we found that  
263 the GTP-specific SCS works specifically in the germline to regulate oocyte mitochondrial  
264 distribution during reproductive aging.

265

### 266 **Mitochondrial fission drives reproductive longevity**

267 It is known that mitochondrial dynamics and distribution are both controlled by the dynamin  
268 family of GTPases that mediate the balance between organellar fusion and fission<sup>9</sup>. To  
269 determine whether the key dynamin family of large GTPases regulate reproductive aging, we  
270 examined EAT-3, FZO-1 and DRP-1, which are *C. elegans* homologs of human OPA1, MFN1/2



271 and DNM1L respectively<sup>37</sup>. Both EAT-3 and FZO-1 control mitochondrial fusion, with EAT-3  
272 driving inner mitochondrial membrane fusion while FZO-1 being responsible for the fusion of the  
273 outer mitochondrial membrane (**Figure 3A**)<sup>38,39</sup>. We found that germline-specific RNAi  
274 knockdown of *eat-3* increases RLS and late fertility (**Figures 3B and 3C, Supplementary Table**  
275 **1**). Meanwhile, knocking down *fzo-1* selectively in the germline did not affect late fertility (**Figure**  
276 **3C**), and only showed slight RLS extension (11.5%) in one out of three trials but having no  
277 effect in the other two (**Figure 3D, Supplementary Table 1**). Thus, in the germline, EAT-3-  
278 mediated inner mitochondrial membrane fusion is involved in regulating reproductive aging. The  
279 *eat-3* mutant was originally discovered showing abnormal pharyngeal pumping and food intake,  
280 like the *eat-2* mutant<sup>40</sup>. The *eat-2* mutant is known to slow down reproductive aging as a result  
281 of caloric restriction<sup>33,40</sup>. To test whether the effect of *eat-3* on reproductive aging is also due to  
282 a reduction in food intake, we have measured the pharyngeal pumping rate and the body size in  
283 worms with the germline-specific *eat-3* RNAi knockdown. We found that worms with germline-  
284 specific *eat-3* RNAi knockdown show a pharyngeal pumping rate and body size  
285 indistinguishable from the controls (**Figures S4A-C**), suggesting that the RLS extension does  
286 not result from caloric restriction.

287

288 In contrast to EAT-3 and FZO-1, DRP-1 drives mitochondrial fission (**Figure 3A**)<sup>41,42</sup>. When we  
289 knocked down *drp-1* by RNAi selectively in the germline, we found that RLS either remains  
290 unchanged (in two replicates) or is slightly decreased (in one replicate), and late fertility is not  
291 altered in these worms (**Figures 3C and 3E, Supplementary Table 1**). Conversely, when we  
292 overexpressed *drp-1* selectively in the germline, the transgenic worms showed an extremely  
293 long RLS compared to control worms (**Figure 3F, Supplementary Table 1**). Together, these  
294 results show that increasing mitochondrial fission factors and decreasing inner mitochondrial  
295 fusion factors in the germline are both sufficient to promote reproductive longevity.

296

297 Next, we examined whether these mitochondrial dynamics factors regulate oocyte mitochondrial  
298 distribution. We found that in the *drp-1* germline-specific overexpression transgenic strain, the  
299 age-associated perinuclear accumulation of oocyte mitochondria is greatly suppressed in day 5  
300 worms (**Figures 3G and S3B**). RNAi knockdown of *eat-3* also decreased the perinuclear  
301 accumulation of oocyte mitochondria in day 5 aged worms (**Figures 3H and S3A**); however,  
302 RNAi knockdown of *fzo-1* did not affect oocyte mitochondrial distribution in either day 1 or day 5  
303 worms (**Figures 3H and S3A**). Upon *drp-1* RNAi knockdown, we observed an increase in the  
304 perinuclear distribution of oocyte mitochondria in day 1 young worms, which however did not

305 reach statistical significance (**Figures 3H and S3A**). In day 5 aged worms, *drp-1* RNAi  
306 knockdown caused disruption in oocyte organization, and mitochondrial morphology became  
307 largely unscorable (**Figures 3H and S3C**). In few oocytes that still have recognizable cell  
308 boundaries, we observed one-sided perinuclear aggregation of mitochondria (**Figure S3A**).  
309 These results suggest that mitochondrial dynamics factors modulate mitochondrial distribution in  
310 the oocyte, which correlates with their regulatory effects on reproductive aging.

### 311 312 **GTP-specific SCS regulates reproductive aging through tuning mitochondrial distribution**

313 We then asked whether the change in mitochondrial distribution is responsible for the  
314 reproductive longevity-promoting effect conferred by the *sucg-1* knockdown. To answer this  
315 question, we have utilized an auxin-inducible degron (AID) system to deplete the DRP-1 protein  
316 specifically in the germline upon the auxin treatment (**Figure 4A**). We first generated a CRISPR  
317 knock-in line (*gfp::degron::drp-1*) in which the endogenous DRP-1 is tagged with GFP and  
318 degron at the N terminus<sup>43</sup>. This line was next crossed with the single-copy integrated  
319 transgenic strain where the auxin-inducible F-box protein TIR1 in the E3 ubiquitin ligase  
320 complex is selectively expressed in the germline (*sun-1p::TIR1::mRuby*)<sup>44</sup>. Using this AID  
321 system, the auxin administration led to TIR1-mediated degradation of the degron-tagged DRP-1  
322 protein in the germline but not in other tissues (**Figure 4B**). We found that the auxin-induced  
323 DRP-1 depletion in the germline causes no significant change in RLS (**Figure 4C**,  
324 **Supplementary Table 1**), recapitulating the finding from germline-specific RNAi knockdown of  
325 *drp-1* (**Figure 3E**). More importantly, although the germline-specific DRP-1 depletion does not  
326 affect RLS on its own, it fully suppressed the RLS extension in the *sucg-1* RNAi knockdown  
327 worms (**Figure 4D, Supplementary Table 1**).

328  
329 Furthermore, the *drp-1* loss-of-function mutant increased perinuclear clustering of oocyte  
330 mitochondria at day 1, and *sucg-1* RNAi knockdown failed to suppress this increase (**Figures**  
331 **4E and S3D**), which suggests that DRP-1 is required for the loss of SUCG-1 to drive oocyte  
332 mitochondrial dispersion. Therefore, mitochondrial GTP metabolism can regulate reproductive  
333 longevity by affecting mitochondrial positioning in the germline through a DRP-1-mediated  
334 mechanism.

### 335 336 **GTP-specific SCS regulates reproductive aging in response to bacterial inputs**

337 To further confirm the difference between *sucg-1* and *suca-1* in regulating reproductive aging,  
338 we generated CRISPR knockout lines for both (**Figure S5A**). *suca-1* knockout worms were

339 phenotypically wild type, and similarly to the RNAi knockdown worms, did not show a change in  
340 RLS (**Figures S5B and S5C, Supplementary Table 1**). On the other hand, while *sucg-1*  
341 homozygous knockout worms appeared wild-type in the parental generation, their progeny  
342 exhibited delayed development as a result of maternal *sucg-1* deficiency. To avoid this maternal  
343 effect, we have generated a heterozygous parental line by crossing the *sucg-1* knockout line  
344 (KO) with the *sucg-1::egfp* knock-in line (GFP) (**Figure 5A**). This way, we can examine the  
345 reproductive phenotype of the progeny that carries the following genotypes: KO/KO, KO/GFP,  
346 and GFP/GFP on the *sucg-1* locus (**Figure 5A**). We found that the *sucg-1* homozygous KO/KO  
347 worms have extended RLS compared to either KO/GFP heterozygous or GFP/GFP  
348 homozygous worms (**Figures 5B and S5D, Supplementary Table 1**). These results confirm  
349 the specificity of GTP-specific SCS in regulating reproductive aging.

350  
351 When examining these knockout mutant worms, we also had an interesting observation that on  
352 OP50 *E. coli*, neither the *sucg-1* nor the *suca-1* homozygous knockout caused an RLS  
353 extension when compared to KO/GFP heterozygous or GFP/GFP homozygous worms (in the  
354 case of *sucg-1* KO) or wild-type worms (in the case of *suca-1* KO) respectively (**Figures 5C and**  
355 **S5E-G, Supplementary Table 3**). Previous findings in our lab revealed that *C. elegans* have  
356 distinct reproductive strategies when exposed to different bacteria. The wild-type worms that  
357 host OP50 *E. coli* have a longer RLS and slower oocyte quality decline with age than those on  
358 HB101 *E. coli*<sup>19</sup>. The wild-type worms on HT115 *E. coli* had similar RLS and late fertility to those  
359 on HB101 but were distinct from those on OP50<sup>19</sup> (**Figures S6A and S6B, Supplementary**  
360 **Table 4**). For the germline-specific RNAi knockdown of *sucg-1*, *sucl-2* or *suca-1*, the  
361 experiments were conducted in the background of HT115 *E. coli* (**Figures 2D, 2E, and S6C,**  
362 **Supplementary Table 1**). When we examined their effects in the background of OP50 *E. coli*,  
363 we found that none of them enhances the RLS extension caused by OP50 (**Figures S6D-F,**  
364 **Supplementary Table 3**). These results suggest that different *E. coli* may affect mitochondrial  
365 GTP to exert different effects on worm reproductive aging.

366  
367 To examine whether bacterial inputs affect mtGTP levels in the germline, we utilized the  
368 transgenic strain where germline mitochondria were tagged with GFP and triple HA and purified  
369 mitochondria using anti-HA immunoprecipitation. We then measured germline mtGTP using  
370 liquid chromatograph coupled with mass spectrometry. We found that in the germline of day 5  
371 aged worms on HT115 *E. coli*, the mtGTP level is increased by nearly 10-fold compared to day  
372 1 young worms, but the mtGTP induction level is only around 3-fold in the germline of worms on

373 OP50 *E. coli* (**Figure 5D**). Moreover, day 5 aged worms on HT115 *E. coli* had a higher germline  
374 mtGTP level compared to worms on OP50 *E. coli*, while no difference in the germline mtGTP  
375 level was observed in day 1 young worms (**Figure 5D**). On the other hand, the germline  
376 mitochondrial ATP (mtATP) level were the same between worms at different ages or on different  
377 bacteria (**Figure 5E**). These results suggest that reproductive longevity conferred by OP50 *E.*  
378 *coli* may be linked to an attenuation in the age-related increase in GTP production.

379

### 380 **Bacteria modulate mitochondrial distribution during reproductive aging**

381 Next, we examined whether OP50 *E. coli* causes changes in oocyte mitochondrial morphology  
382 using the transgenic strain expressing TOMM-20::GFP in the germline. When compared to  
383 worms on HT115 *E. coli*, worms on OP50 *E. coli* attenuated the age-associated increase in the  
384 mitochondrial clustering around the oocyte nucleus (**Figures 6A and S3E**). Moreover, germline-  
385 specific depletion of the DRP-1 protein or the germline-specific RNAi knockdown of *drp-1* fully  
386 suppressed the RLS extension in the worms on OP50 *E. coli* (**Figures 6B and S6G,**  
387 **Supplementary Table 3**). In addition, with the AID system, we could apply the auxin treatment  
388 only during adulthood. This way, the loss of DRP-1 occurred after the germline completes  
389 development and switches from spermatogenesis to oogenesis. We found that this adult-only  
390 depletion of DRP-1 in the germline suppresses the RLS extension in the worms on OP50 *E. coli*  
391 (**Figure 6C, Supplementary Table 3**), supporting the significance of oocyte mitochondrial  
392 distribution in regulating reproductive aging. Furthermore, the germline-specific overexpression  
393 of *drp-1* increases RLS in worms on either HT115 (**Figure 3F, Supplementary Table 1**) or  
394 OP50 *E. coli* (**Figure 6D, Supplementary Table 3**); while the germline-specific RNAi  
395 knockdown of *eat-3* could only extend RLS in worms on HT115 *E. coli* (**Figure 3B,**  
396 **Supplementary Table 1**) but failed to further enhance the RLS extension in worms on OP50 *E.*  
397 *coli* (**Figure 6E, Supplementary Table 3**). Like in worms on HT115 *E. coli*, germline-specific  
398 RNAi knockdown of *fzo-1* does not alter RLS in worms on OP50 *E. coli* (**Figure S6H,**  
399 **Supplementary Table 3**).

400

401 Furthermore, we found that *drp-1* RNAi knockdown largely disturbs oocyte organization and  
402 mitochondrial distribution in day 5 aged worms on OP50 *E. coli* (**Figures 6F and S3G**), and in  
403 the small percentage of oocytes with recognizable cell boundaries, one-sided perinuclear  
404 aggregation of mitochondria was observed (**Figure S3F**). On the other hand, RNAi knockdown  
405 of either *eat-3* or *fzo-1* had no effects on oocyte mitochondrial distribution in worms on OP50 *E.*  
406 *Coli* (**Figures 6F and S3F**). RNAi knockdown of *sucg-1*, *sucl-2*, or *suca-1* could not alter oocyte

407 mitochondrial distribution in worms on OP50 *E. coli* either (**Figures S6I and S3F**). Together,  
408 these results suggest that like GTP-specific SCS, OP50 bacterial inputs modulate mitochondrial  
409 distribution and reproductive longevity via mitochondrial dynamics factors.

410

#### 411 **Vitamin B12 deficiency in OP50 *E. coli* contributes to reproductive longevity**

412 The previous study in our lab revealed that the trace amount of HB101 *E. coli* mixing in OP50 *E.*  
413 *coli* is sufficient to shorten RLS of *C. elegans*, suggesting the involvement of bioactive  
414 metabolites in regulating reproductive aging. Interestingly, it is known that OP50 *E. coli* is low in  
415 vitamin B12 (VB12), and the VB12 level affects mitochondrial dynamics in the muscle of *C.*  
416 *elegans*<sup>45-47</sup>. To test whether VB12 deficiency in OP50 *E. coli* could contribute to reproductive  
417 longevity, we supplied two different forms of VB12, methylcobalamin (meCbl) and  
418 adenosylcobalamin (adoCbl) to worms on OP50 and HT115 *E. coli*. We discovered that  
419 supplementation of either meCbl or adoCbl reduces the RLS extension in worms on OP50 *E.*  
420 *coli* but does not affect RLS in worms on HT115 *E. coli* (**Figures 7A, 7B, S7A, and S7B,**  
421 **Supplementary Table 1 and 3**). In addition, meCbl supplementation increased the perinuclear  
422 accumulation of oocyte mitochondria in day 5 worms on OP50 *E. coli* (**Figures 7C and S3H**), to  
423 the level similar in worms on VB12 sufficient HT115 *E. coli*. These results suggest that bacteria-  
424 derived VB12 plays a crucial role in regulating oocyte mitochondrial distribution and  
425 reproductive aging.

426

427 We further examined whether VB12 signals through GTP-specific SCS to modulate reproductive  
428 aging. We found that although the *sucg-1* heterozygous mutant (KO/GFP) and *gfp* homozygous  
429 (GFP/GFP) worms experience a decrease in RLS when supplied with meCbl, this decrease was  
430 not observed in the *sucg-1* homozygous (KO/KO) mutant worms (**Figures 7D, S7C, and S7D,**  
431 **Supplementary Table 3**). This result suggests that SUCG-1 is required for VB12 to regulate  
432 reproductive aging. Two enzymes utilize VB12 as cofactor for their function, namely MMCM-1,  
433 which is a mitochondrial enzyme that converts methymalonyl-CoA to succinyl-CoA, and METR-  
434 1, the methionine synthase that converts homocysteine to methionine. We discovered that  
435 *mmcm-1* RNAi knockdown does not affect RLS in worms on either OP50 or HT115 *E. coli*  
436 (**Figures S7E and S7F, Supplementary Table 1 and 3**). These results further support that  
437 succinyl-CoA is not involved in the regulation of reproductive aging. On the other hand, *metr-1*  
438 RNAi knockdown increased RLS in worms on HT115 but not OP50 *E. coli* (**Figures S7E and**  
439 **S7F, Supplementary Table 1 and 3**), suggesting that the VB12-methionine synthase branch,  
440 which controls purine synthesis<sup>48,49</sup>, mediates the bacterial effect on reproductive aging.

## 441 DISCUSSION

442

443 In summary, our work discovered that mitochondrial GTP-specific SCS plays a crucial role in  
444 regulating oocyte mitochondrial distribution and reproductive health during aging, and further  
445 revealed that bacterial inputs act through this mechanism to modulate reproductive longevity  
446 (**Figure 7E**). We found that mitochondria exhibit dispersed structure in young oocytes, but  
447 undergo perinuclear clustering in aged oocytes. Interestingly, the similar age-associated change  
448 in oocyte mitochondrial distribution was also observed in mice, which has been linked to  
449 decreased Drp1 activity<sup>10</sup>. In our studies, we found that germline-specific overexpression of *drp-*  
450 *1* is sufficient to prolong RLS, through suppressing perinuclear clustering of oocyte  
451 mitochondria. These findings demonstrate an evolutionally conserved role of DRP1-directed  
452 mitochondrial fission in regulating reproductive health.

453

454 The knockdown of *eat-3* or *fzo-1* should tilt the balance toward mitochondrial fission as well.  
455 However, their effects on reproductive longevity are distinct. While the *eat-3* RNAi knockdown  
456 was sufficient to prolong reproductive lifespan and improve late fertility, the *fzo-1* RNAi  
457 knockdown failed to do so. In mice, oocyte-specific knockout of Mfn1 but not Mfn2 results in  
458 increased mitochondrial clustering, as well as defective folliculogenesis, impaired oocyte quality  
459 and sterility<sup>12</sup>. Thus, different mitochondrial fusion factors may play distinctive roles in regulating  
460 oocyte quality and reproductive aging. Moreover, unlike the germline-specific overexpression of  
461 *drp-1* that extended RLS in both HT115 and OP50 bacterial background, the germline-specific  
462 knockdown of *eat-3* could not further enhance the RLS extension caused by OP50 bacteria. In  
463 addition to its requirement for the RLS extension conferred by OP50 bacteria, DRP-1 is reported  
464 in a recent study to be necessary for the RLS extension in the mutant of *daf-2*, the *C. elegans*  
465 homolog of insulin and IGF-1 receptor<sup>50</sup>. Our studies also showed that the RLS extension  
466 caused by the loss of the GTP-specific SCS is dependent on DRP-1. These findings together  
467 suggest that multiple regulatory mechanisms may converge on the mitochondrial fission factor  
468 DRP-1 to regulate the reproductive aging process. Therefore, increasing DRP-1 levels  
469 selectively in the reproductive system is an effective way to promote reproductive longevity,  
470 which drives mitochondrial dynamics toward fission without disrupting the fusion process.

471

472 It's important to note that although most studies related to mitochondrial dynamics factors focus  
473 on mitochondrial morphology (tubular vs fragmented), their regulation of mitochondrial  
474 distribution has been observed in both oocytes and somatic cells. In aged mice and mice with

475 Drp1 KO, the oocyte mitochondrial network is aggregated toward the perinuclear region and  
476 only a small part of the mitochondrial network exhibits tubular morphology<sup>10</sup>. Interestingly,  
477 calcium homeostasis that is crucial for oocyte quality is also disrupted in these mice, which  
478 attributes to increased ER-mitochondria aggregation<sup>10</sup>. Moreover, in mouse oocytes  
479 overexpressing Mfn1 or Mfn2, the mitochondrial network becomes aggregated toward the  
480 perinuclear region without increasing tubular elongation<sup>11</sup>. The Mfn1-induced perinuclear  
481 aggregation of mitochondria results in disrupted chromosome alignment and disorganized  
482 spindle formation in oocytes<sup>11</sup>. In somatic cells, perinuclear clustering of mitochondria is also  
483 observed when mitochondrial dynamics factors are modified. Notably, Drp1 knockdown  
484 abrogates mitochondria mobilization toward peripheral immune synapse following T-cell  
485 activation<sup>51</sup>. In pancreatic beta cells, Drp1 knockout results in mitochondria clustering on one  
486 side of the nucleus<sup>52</sup>. Similarly, OPA1 overexpression leads to perinuclear clustering of  
487 mitochondria in HeLa cells<sup>53</sup>, and overexpression of MFN2 causes perinuclear clustering of  
488 mitochondria in multiple cell types<sup>54–57</sup>.

489  
490 Now, our data support that the key role of mitochondrial dynamic factors in regulating  
491 reproductive aging is predominantly attributed to their control of mitochondrial positioning in  
492 oocytes. Perinuclear clustered mitochondria have been associated with cellular stress, such as  
493 viral infection, heat shock, hypoxia, and apoptotic stress<sup>58–64</sup>. Transient perinuclear clustering  
494 may help elicit transcriptional responses<sup>58</sup> and sequester damaged mitochondria<sup>65</sup>, to restore  
495 mitochondrial homeostasis. However, prolonged perinuclear clustering of oocyte mitochondria in  
496 aged worms and mice could block mitophagy-mediated clearance of damaged mitochondria,  
497 increase ER-mitochondria aggregation to impair calcium homeostasis, as well as disrupt  
498 mitochondrial segregation required for cell division upon fertilization. Our studies provide direct  
499 evidence that dietary and genetic interventions that drive mitochondrial dispersion from the  
500 perinuclear cluster sufficiently promote reproductive longevity in worms. It would be interesting  
501 to test whether similar mechanisms could help improve reproductive health during aging in  
502 mammals.

503  
504 It is known that mitochondrial dynamics is influenced by cellular metabolism<sup>66</sup>. However,  
505 whether and how mitochondrial metabolism is directly linked with mitochondrial dynamics  
506 remains poorly understood. Our studies reveal that the GTP-specific SCS regulates  
507 mitochondrial dynamics in oocytes during the aging process and contributes to the regulation of  
508 reproductive longevity. SCS locates in the mitochondrial matrix, likely to be very close to the

509 mitochondrial inner membrane. It is reported that various enzymes in the TCA cycle interact  
510 closely and form a metabolon to facilitate their reactions<sup>67</sup>. One of these enzymes, succinate  
511 dehydrogenase, is part of the respiratory complex II and anchored in the mitochondrial inner  
512 membrane<sup>68</sup>. Given that SCS provides succinate for succinate dehydrogenase as a substrate,  
513 the interaction between these two enzymes may recruit SCS close to the inner membrane,  
514 leading to a high local GTP level when the TCA cycle is active. Interestingly, it was reported that  
515 inner mitochondrial membrane fusion requires a higher concentration of GTP than outer  
516 mitochondrial fusion<sup>69</sup>. Furthermore, members of another family of GTP-producing enzymes,  
517 nucleoside diphosphate kinases, have been shown to directly interact with OPA1 in the  
518 mitochondrial inner membrane to regulate mitochondrial membrane dynamics in human  
519 cells<sup>36,70</sup>. Our studies found that the germline-loss of EAT-3/OPA1, but not FZO-1/MFN1/2  
520 recapitulates the effect of the germline-loss of SUCG-1 in promoting reproductive longevity.  
521 Considering the age-associated increase in the germline SUCG-1 level, it is possible that an  
522 increase in GTP production close to the inner membrane drives mitochondrial fusion via EAT-3  
523 during the reproductive aging process, and this imbalance of mitochondrial dynamics  
524 consequently contributes to the decline of oocyte quality.

525  
526 Upon the exposure to OP50 *E. coli*, worms exhibited extended RLS, which was suppressed by  
527 VB12 suppression but could not be further enhanced by the *sucg-1* knockdown. However, the  
528 *sucg-1* knockdown could sufficiently restore RLS extension in worms on OP50 *E. coli*  
529 supplemented with VB12. Based on these results, we speculate that bacterial VB12 accelerates  
530 reproductive aging through increasing germline mtGTP levels. Interestingly, RNAi knockdown of  
531 *metr-1*, which encodes the VB12-dependent methionine synthase (MTR), extends RLS in the  
532 background of HT115 but not OP50 *E. coli*. MTR catalyzes the production of methionine from  
533 homocysteine, in accordance with converting 5-methyl-tetrahydrofolate into tetrahydrofolate  
534 (THF). Two recent studies discovered that THF replenishing by MTR promotes tumor growth by  
535 supporting purine synthesis, and MTR loss results in decreased GTP and ATP levels<sup>48,49</sup>. Thus,  
536 on HT115 *E. coli*, the higher level of VB12 could increase the MTR-mediated metabolic process,  
537 leading to more GTP synthesis in the cytosol and in turn a higher mtGTP level. Consistently, we  
538 found that the germline mtGTP level is elevated in day 5 aged worms, which is likely a result of  
539 the age-associated increase in GTP-specific SCS. Moreover, this increase in the germline  
540 mtGTP level is significantly greater in the background of HT115 *E. coli* than OP50 *E. coli*, which  
541 is likely due to the high VB12-MTR level associated with HT115. At present, we do not have  
542 direct evidence on how bacteria-derived VB12 modulates GTP-specific SCS in the reproductive



543 system, aside from genetic analysis confirming the requirement of SUCG-1 for the effect of  
544 VB12. No mRNA or protein level difference was detected between OP50 and HT115 conditions.  
545 It is possible that VB12 influences the activity and/or substrate availability of GTP-specific SCS  
546 in oocyte mitochondria, which remains to be determined in future studies.

547

548 We discovered that low environmental VB12 levels are associated with reproductive longevity.  
549 There are significant variations in VB12 levels among different bacterial species. It is known that  
550 high levels of VB12 in the *Comamonas* DA1877 diet results in decreased fertility in *C.*  
551 *elegans*<sup>45,71</sup>. On the other hand, *Qin et al.* reported that early-life VB12 deficiency is associated  
552 with adulthood sterility caused by germline ferroptosis in *C. elegans*<sup>72</sup>. Furthermore, in humans,  
553 a high maternal VB12 level at birth is associated with an increased risk of developing autism  
554 spectrum disorder in children<sup>73</sup>. However, VB12 deficiency can also lead to adverse maternal  
555 and child health problems<sup>74,75</sup>, and an adequate amount of VB12 supplementation during  
556 pregnancy is recommended by the World Health Organization. Thus, there may be an  
557 antagonistic pleiotropy-like effect at the nutrient level, wherein VB12 is essential for appropriate  
558 development of germline and progeny, but later accelerates reproductive decline during aging.  
559 Our study suggests that environmental inputs from the microbiota should also be taken into  
560 account when considering this antagonistic pleiotropic effect.

561

562

563

564

565

566

567

568

569

570

571

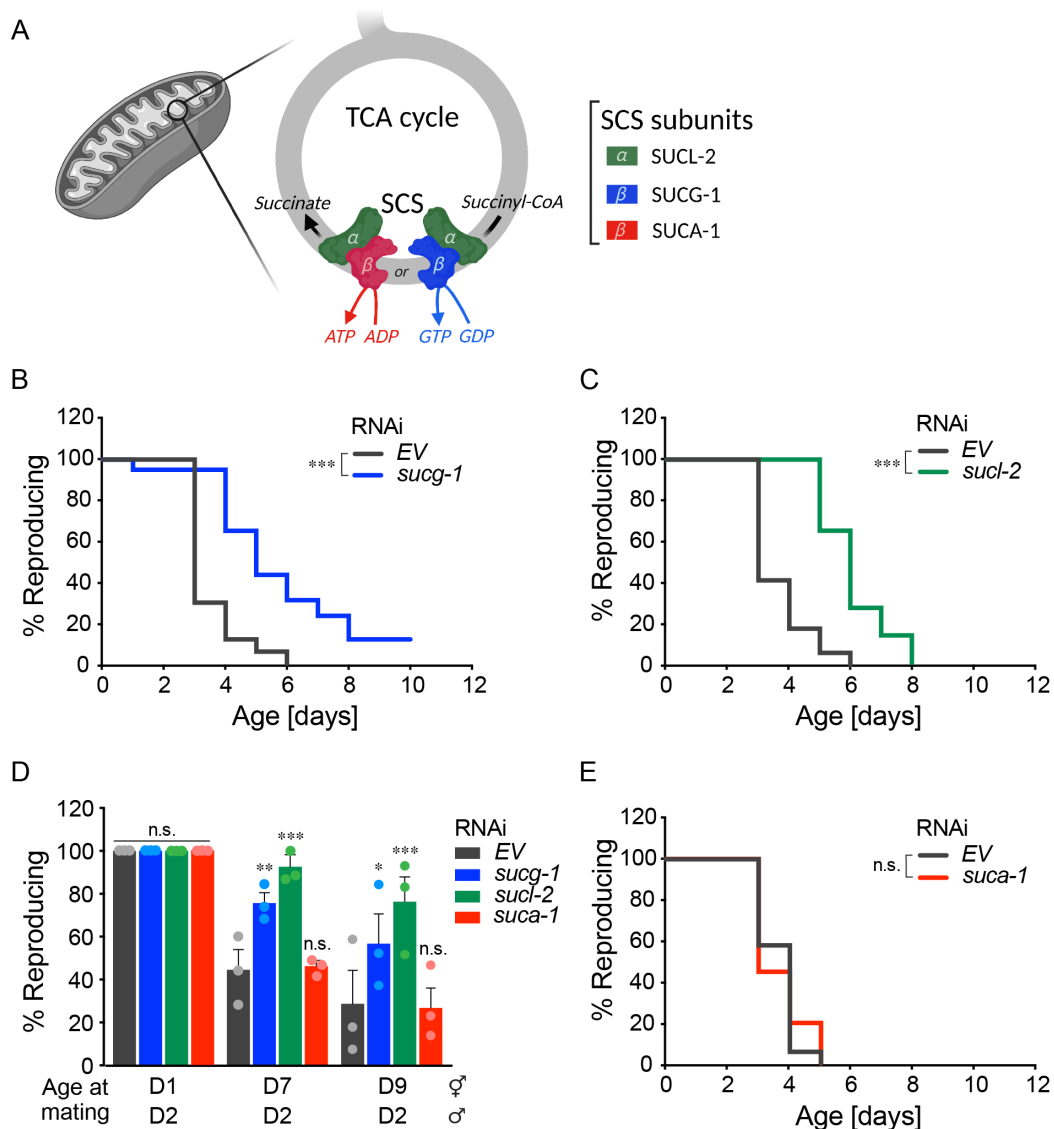

572

### 573 **Figure 1. GTP-specific Succinyl-CoA Synthetase (SCS) regulates reproductive aging**

574 (A) A diagram of SCS enzymatic function and its ATP or GTP specificity. (B) Wild-type (WT)  
 575 worms subjected to *sucg-1* RNA interference (RNAi) have a significantly longer reproductive  
 576 lifespan (RLS) than those subjected to the empty vector (EV) control. (C) WT worms subjected  
 577 to *sucl-2* RNAi have a longer RLS than those subjected to the EV control. (D) Day 7 and 9 WT  
 578 hermaphrodites subjected to *sucg-1* or *sucl-2* but not *suca-1* RNAi show higher rates of  
 579 reproduction than those subjected to the EV control, when mated with day-2-old males. (E) WT  
 580 worms subjected to *suca-1* RNAi show no significant differences in RLS compared to those  
 581 subjected to the EV control.

582 (B, C, E) n.s.  $p > 0.05$ , \*\*\*  $p < 0.001$  by log-rank test;  $n = 3$  biological independent replicates,  
 583 ~20 worms per replicate, see Supplementary Table 1 for full RLS Data. (D) Error bars represent  
 584 mean  $\pm$  s.e.m.,  $n = 3$  biologically independent samples, n.s.  $p > 0.05$ , \*  $p < 0.05$ , \*\*  $p < 0.01$ , \*\*\*

585  $p < 0.001$  by Fisher's exact test adjusted with the Holm–Bonferroni method for multiple  
586 comparisons, ~20 worms per replicate.

587

588

589

590

591

592

593

594

595

596

597

598

599

600

601

602

603

604

605

606

607

608

609

610

611

612

613

614

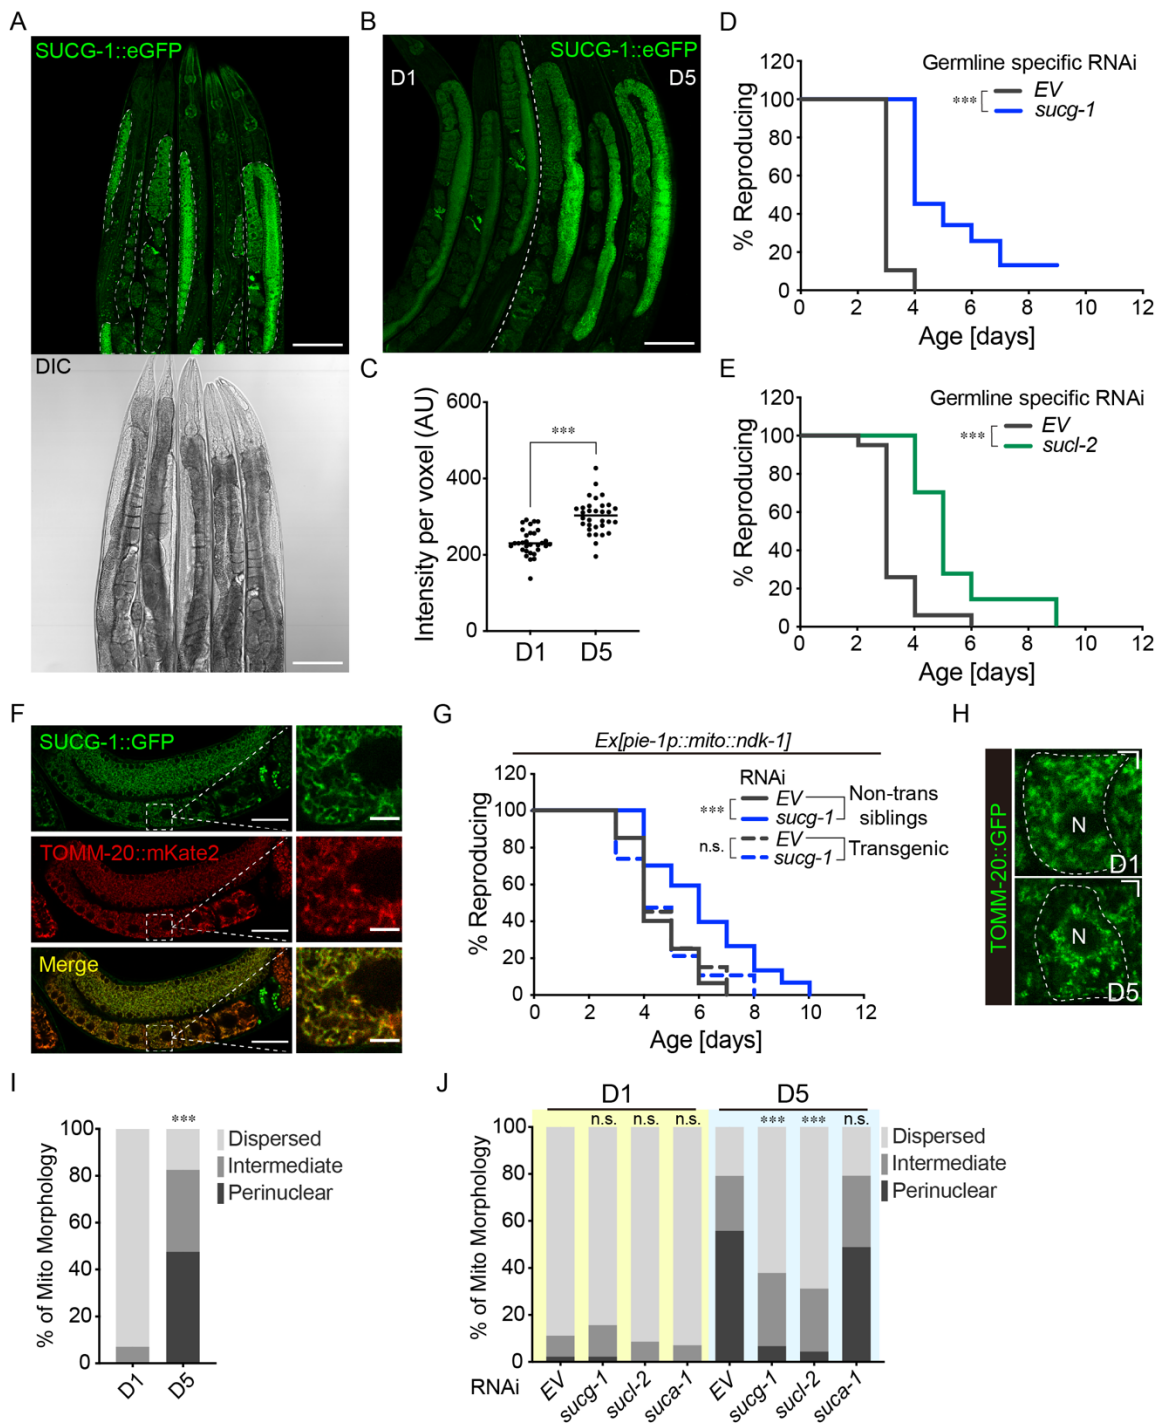

615

616 **Figure 2. GTP-specific SCS functions in the germline to regulate oocyte mitochondria**  
 617 **during reproductive aging**

618 (A) Confocal imaging of the SUCG-1::eGFP knock-in line, in which the endogenous *sucg-1* is  
 619 tagged with *egfp*, reveals its predominant expression in the germline but weak expression in the  
 620 intestine, pharynx, muscle, hypodermis and neurons (Scale bar: 100µm; Dashed white line:  
 621 germline). (B) The SUCG-1::eGFP level in the germline is increased at day 5 compared to day 1  
 622 (Scale bar: 100µm). (C) Quantification of SUCG-1::eGFP level in the germline at day 1 and day

623 5. (D) Germline-specific RNAi inactivation of *sucg-1* extends RLS. (E) Germline-specific RNAi  
624 inactivation of *suc1-2* extends RLS. (F) SUCG-1::eGFP colocalizes with mitochondrial TOMM-  
625 20::mKate2 in the germline (Scale bar: 30 $\mu$ m for the images with lower magnification; 5 $\mu$ m for  
626 the images with higher magnification). (G) Overexpression of mitochondria-targeted *ndk-*  
627 *1(mito::ndk-1)* in the germline suppressed the RLS extension caused by *sucg-1* RNAi  
628 knockdown. (H) Representative images show that oocyte mitochondria are largely dispersed at  
629 day 1 while increasing perinuclear distribution at day 5 (Scale bar: 5 $\mu$ m; Dashed white line:  
630 oocyte outline; N: nucleus). (I) Perinuclear clustering of oocyte mitochondria is increased from  
631 day 1 to day 5. (J) The increase in perinuclear distribution of oocyte mitochondria at day 5 is  
632 suppressed by *sucg-1* or *suc1-2*, but not *suca-1* RNAi knockdown.

633

634 (C) \*\*\*  $p < 0.001$  by Student's t-test; n = 31 (day 1), n = 32 (day 5). (D, E, G) \*\*\*  $p < 0.001$  by  
635 log-rank test; n = 4 (D) or 3 (E, G) biological independent replicates, ~20 worms per replicate,  
636 see Supplementary Table 1 for full RLS Data. (I) n = 43 (day 1) and n = 40 for (day 5); \*\*\*  $p <$   
637  $0.001$  by Chi-squared test. (J) n = 45 (EV, D1), n = 45 (*sucg-1*, D1), n = 45 (*suc1-2*, D1), n = 45  
638 (*suca-1*, D1), n = 42 (EV, D5), n = 45 (*sucg-1*, D5), n = 44 (*suc1-2*, D5) and n = 48 (*suca-1*, D5);  
639 RNAi vs. EV, n.s.  $p > 0.05$ , \*\*\*  $p < 0.001$  by Chi-squared test adjusted with the Holm–Bonferroni  
640 method for multiple comparisons.

641

642

643

644

645

646

647

648

649

650

651

652

653

654

655

656

657

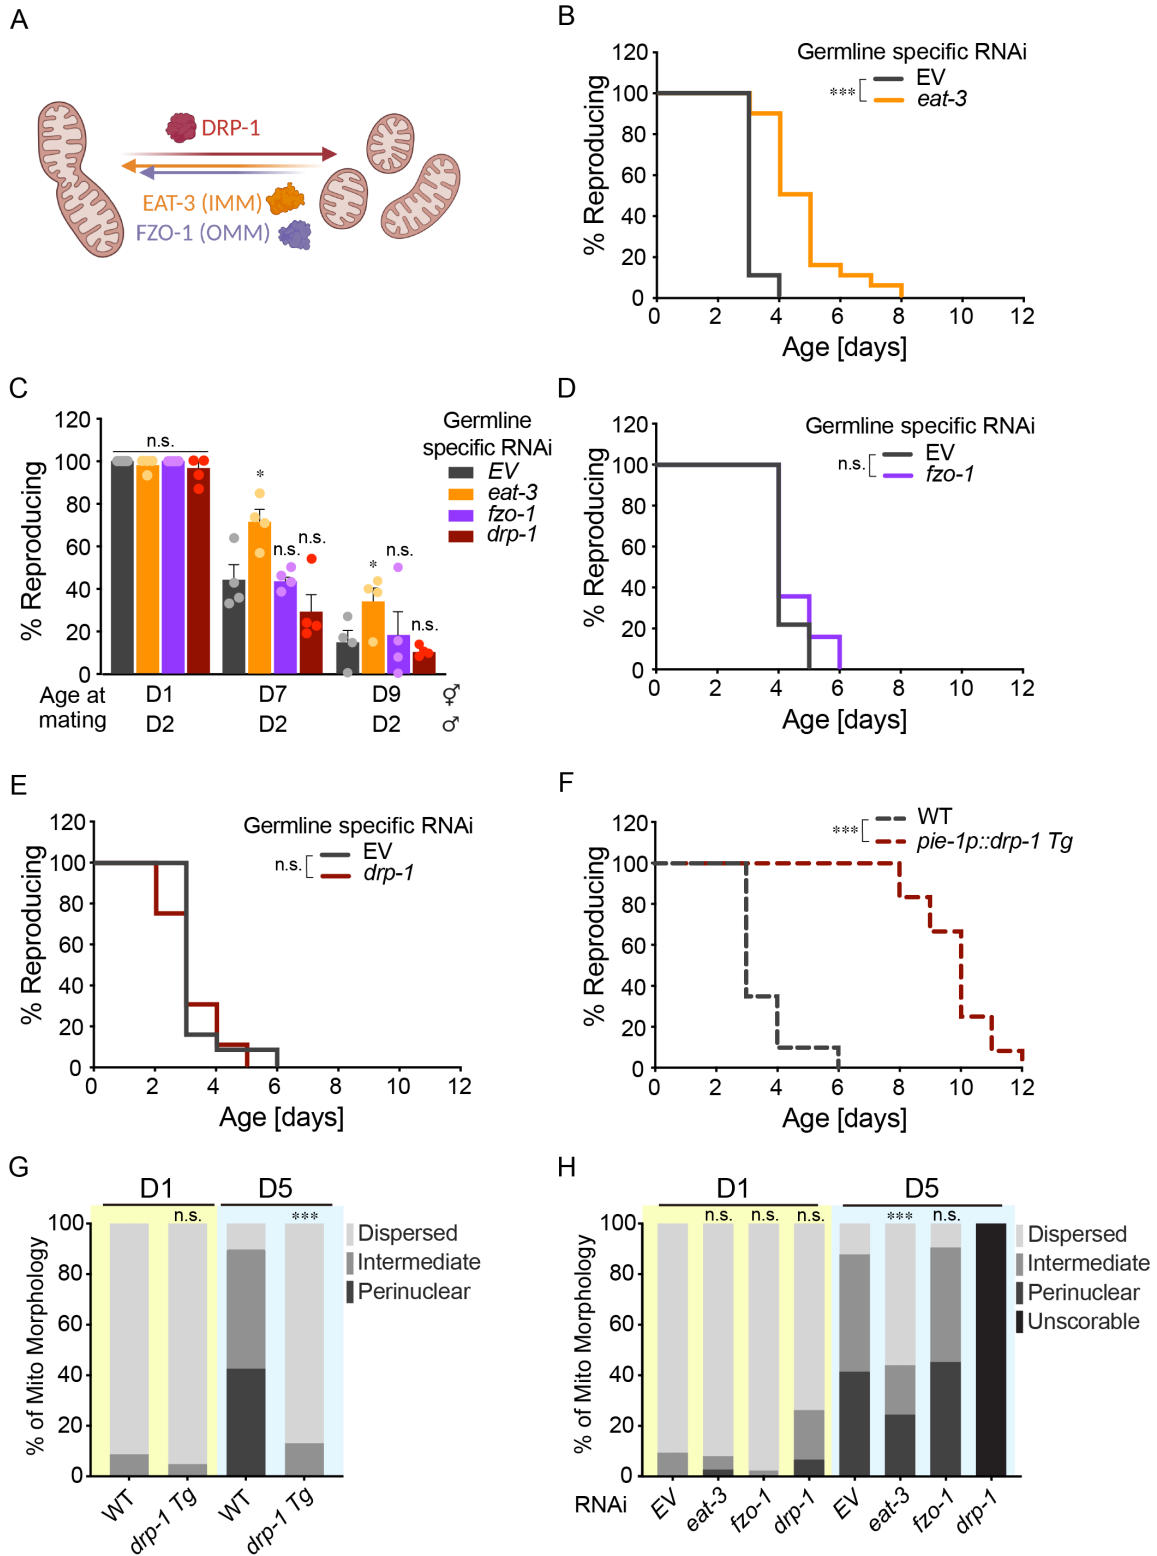

658

659 **Figure 3. Mitochondrial dynamics factors regulate reproductive longevity**

660 (A) A diagram showing regulation of mitochondrial dynamics by GTPase DRP-1, FZO-1 and  
 661 EAT-3 (IMM: Inner mitochondrial membrane; OMM: Outer mitochondrial membrane). (B)

662 Germline-specific RNAi inactivation of *eat-3* extends RLS. (C) Day 7 and 9 aged  
663 hermaphrodites subjected to germline-specific *eat-3* RNAi have a higher rate of reproduction  
664 than those subjected to the EV control when mated with day-2-old young males, while germline-  
665 specific RNAi inactivation of *fzo-1* or *drp-1* RNAi does not affect the rate of reproduction at all  
666 ages. (D) Germline-specific RNAi inactivation of *fzo-1* does not affect RLS. (E) Germline-  
667 specific RNAi inactivation of *drp-1* does not affect RLS. (F) Germline-specific overexpression of  
668 *drp-1* prolongs RLS. (G) The perinuclear clustering of oocyte mitochondria at day 5 is  
669 decreased in the transgenic strain with germline-specific *drp-1* overexpression. (H) The increase  
670 in the perinuclear distribution of oocyte mitochondria at day 5 is decreased upon *eat-3* but not  
671 *fzo-1* RNAi knockdown. The distribution of oocyte mitochondria is not scorable in day 5 aged  
672 worms subjected to *drp-1* RNAi knockdown due to distorted germline.

673 (B, D, E, F) n.s.  $p > 0.05$ , \*\*\*  $p < 0.001$  by log-rank test;  $n = 3$  biological independent replicates,  
674 ~20 worms per replicate, see Supplementary Table 1 for full RLS Data. (C) Error bars represent  
675 mean  $\pm$  s.e.m.,  $n = 4$  biologically independent samples, n.s.  $p > 0.05$ , \*  $p < 0.05$  by Fisher's  
676 exact test adjusted with the Holm–Bonferroni method for multiple comparisons, ~15 worms per  
677 replicate. (G)  $n = 46$  (WT, D1),  $n = 42$  (*drp-1* OE, D1),  $n = 40$  (WT, D5),  $n = 46$  (*drp-1* OE, D5);  
678 WT vs. *drp-1* OE, n.s.  $p > 0.05$ , \*\*\*  $p < 0.001$  by Chi-squared test. (H)  $n = 43$  (EV, D1),  $n = 38$   
679 (*eat-3*, D1),  $n = 40$  (*fzo-1*, D1),  $n = 46$  (*drp-1*, D1),  $n = 41$  (EV, D5),  $n = 41$  (*eat-3*, D5),  $n = 42$   
680 (*fzo-1*, D5); RNAi vs. EV, n.s.  $p > 0.05$ , \*\*\*  $p < 0.001$  by Chi-squared test adjusted with the  
681 Holm–Bonferroni method for multiple comparisons.

682

683

684

685

686

687

688

689

690

691

692

693

694

695

696

697

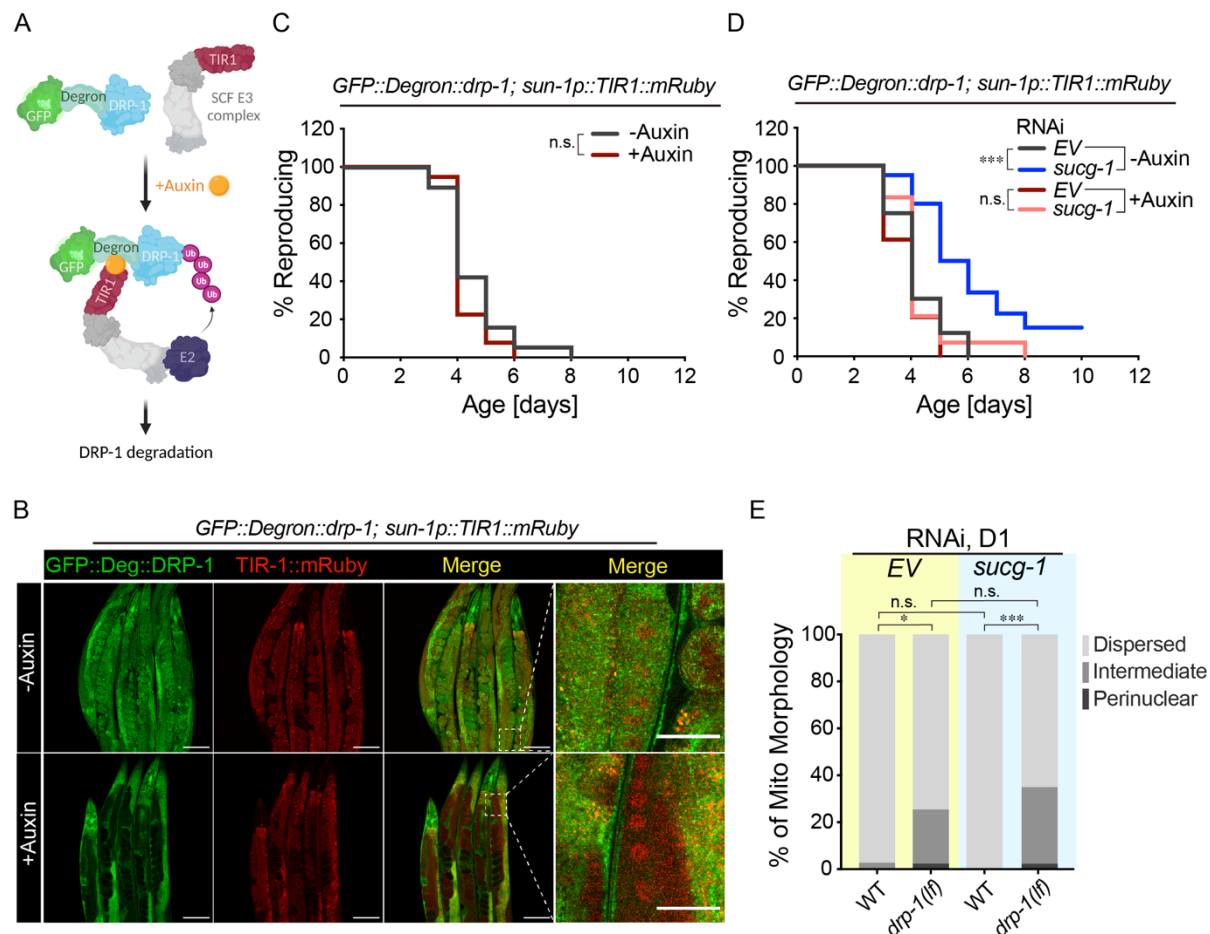

698

699 **Figure 4. GTP-specific SCS regulates reproductive aging through mitochondrial**  
 700 **dynamics factors**

701 (A) A diagram demonstrating auxin-induced degradation of endogenous DRP-1 tagged with  
 702 GFP and Degron. (B) Confocal imaging of GFP shows that the endogenous DRP-1 protein is  
 703 specifically depleted in the germline upon the auxin treatment (Scale bar: 100µm for the images  
 704 with lower magnification; 30µm for the images with higher magnification). (C) Auxin-induced  
 705 germline-specific depletion of DRP-1 does not affect RLS. (D) Auxin-induced germline-specific  
 706 depletion of DRP-1 abrogates the RLS extension caused by *sucg-1* RNAi. (E) The *drp-1* loss-of-  
 707 function mutant increases the perinuclear clustering of oocyte mitochondria at day 1, which is  
 708 not suppressed by *sucg-1* RNAi knockdown.

709 (C, D) n.s.  $p > 0.05$ , \*\*\*  $p < 0.001$  by log-rank test;  $n = 3$  biological independent replicates, ~20  
 710 worms per replicate, see Supplementary Table 1 for full RLS Data. (E)  $n = 38$  (WT, EV RNAi,  
 711 D1),  $n = 41$  (*drp-1(tm1108)*, EV RNAi, D1),  $n = 41$  (WT, *sucg-1* RNAi, D1),  $n = 46$  (*drp-*  
 712 *1(tm1108)*, *sucg-1* RNAi, D1); RNAi vs EV, \*  $p < 0.05$ , \*\*\*  $p < 0.001$  by Chi-squared test  
 713 adjusted with the Holm–Bonferroni method for multiple comparisons.

714

715



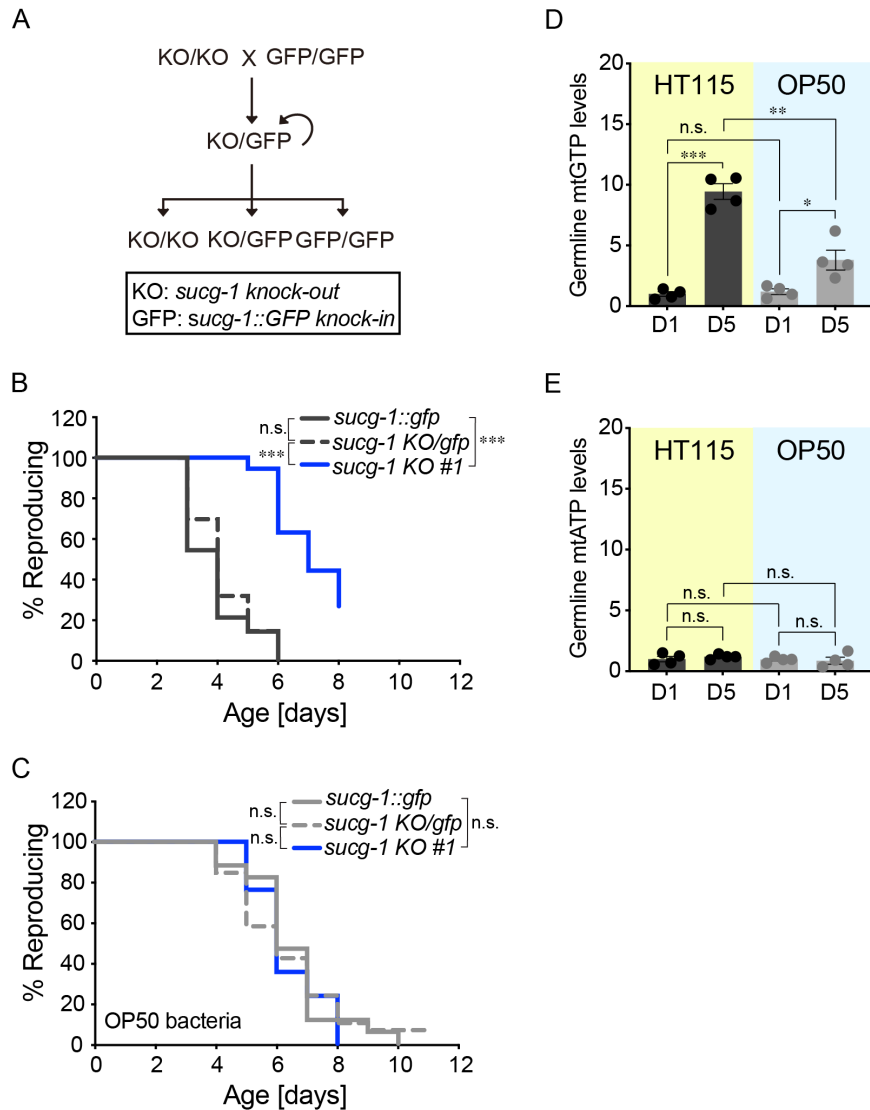

716

717 **Figure 5. Bacterial inputs regulate germline mitochondrial GTP and reproductive aging**

718 (A) A diagram showing the strategy to obtain *sucg-1* homozygous knockout (KO) mutants from  
 719 heterozygous mutants with *sucg-1* KO at one locus and *sucg-1::egfp* (GFP) at the other locus.  
 720 (B) *sucg-1* KO/KO mutants show a significant increase in RLS compared to *sucg-1* GFP/GFP  
 721 and *sucg-1* KO/GFP worms. (C) With OP50 bacteria, *sucg-1* KO/KO mutants show no  
 722 significant differences in RLS compared to *sucg-1* GFP/GFP or *sucg-1* KO/GFP worms. (D)  
 723 Germline mitochondrial GTP (mtGTP) level is increased by 9.4-fold in day 5 aged worms  
 724 compared to day 1 young worms on HT115 bacteria. With OP50 bacteria, the germline mtGTP  
 725 level increase from day 1 to day 5 is 3-fold. The germline mtGTP level is higher in worms on  
 726 HT115 than those on OP50 at day 5, but not at day 1. (E) Germline mitochondrial ATP (mtATP  
 727 level) is not significantly different in worms of different ages and on different bacteria.

728 (B, C) n.s.  $p > 0.05$ , \*\*\*  $p < 0.001$  by log-rank test;  $n = 3$  biological independent replicates, ~80  
 729 worms per replicate split into 3 genotypes, see Supplementary Table 1 (B) and Supplementary  
 730 Table 3 (C) for full RLS Data. (D, E) Error bars represent mean  $\pm$  s.e.m.,  $n = 4$  biologically

731 independent samples, n.s.  $p > 0.05$ , \*  $p < 0.05$ , \*\*  $p < 0.01$ , \*\*\*  $p < 0.001$  by Student's t-test  
732 adjusted with the Holm–Bonferroni method for multiple comparisons.

733

734

735

736

737

738

739

740

741

742

743

744

745

746

747

748

749

750

751

752

753

754

755

756

757

758

759

760

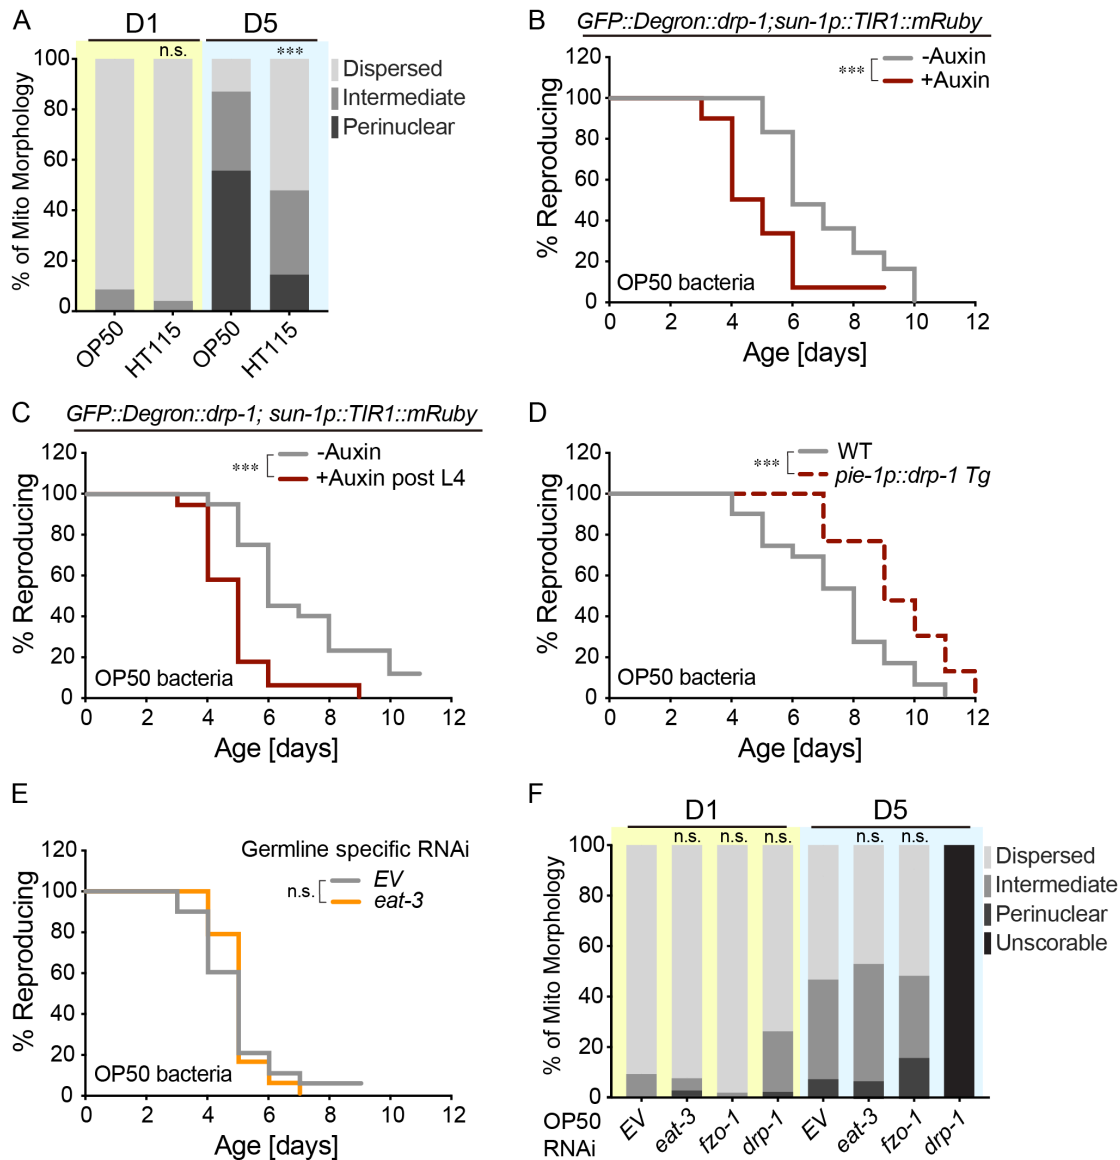

761

762 **Figure 6. Mitochondrial dynamics factors mediate bacterial effects on reproductive**  
 763 **longevity**

764 (A) The perinuclear clustering of oocyte mitochondria is decreased in day 5 worms on OP50  
 765 compared to those on HT115 bacteria. (B) Auxin-induced germline-specific depletion of DRP-1  
 766 reduces RLS in worms on OP50 bacteria. (C) Adult-only depletion of DRP-1 reduces RLS in  
 767 worms on OP50 bacteria. (D) Germline-specific overexpression of *drp-1* prolongs RLS in worms  
 768 on OP50 bacteria. (E) Germline-specific RNAi inactivation of *eat-3* fails to extend RLS in worms  
 769 on OP50 bacteria. (F) With OP50 bacteria, the distribution of oocyte mitochondria is not  
 770 significantly different between control worms and those with *eat-3* or *fzo-1* RNAi knockdown at  
 771 day 5. With *drp-1* RNAi knockdown, oocyte mitochondrial distribution becomes unscorable due  
 772 to distorted germline.

773 (A) n = 48 (HT115, D1), n = 53 (OP50, D1), n = 47 (HT115, D5), and n = 48 (OP50, D5); HT115  
 774 vs. OP50, n.s.  $p > 0.05$ , \*\*\*  $p < 0.001$  by Chi-squared test. (B, C, D, E) n.s.  $p > 0.05$ , \*\*\*  $p <$

775 0.001 by log-rank test; n = 3 (B, C, D) or 4 (E) biological independent replicates, ~20 worms per  
776 replicate, see Supplementary Table 3 for full RLS Data. (F) n= 44 (EV, D1), n = 43 (*eat-3*, D1), n  
777 = 41 (*fzo-1*, D1), n = 42 (*drp-1*, D1), n = 43 (EV, D5), n = 43 (*eat-3*, D5), n = 43 (*fzo-1*, D5);  
778 OP50 condition; RNAi vs. EV, n.s.  $p > 0.05$  by Chi-squared test adjusted with the Holm-  
779 Bonferroni method for multiple comparisons.

780

781

782

783

784

785

786

787

788

789

790

791

792

793

794

795

796

797

798

799

800

801

802

803

804

805

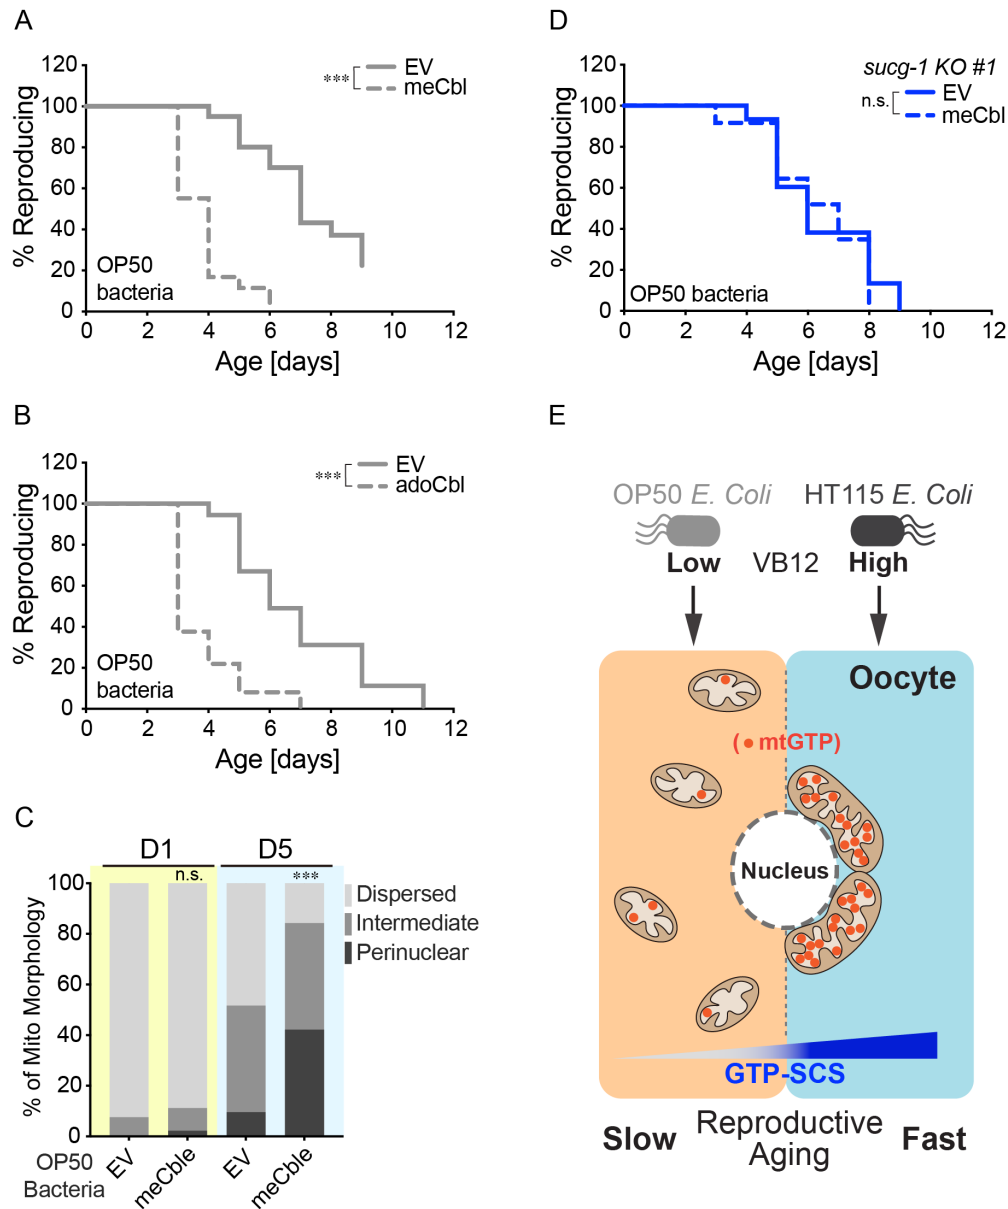

806

807 **Figure 7. Bacterial VB12 regulates oocyte mitochondria and reproductive aging**

808 (A, B) Supplementation of meCbl or adoCbl shortens RLS of WT worms on OP50 bacteria. (C)  
 809 Supplementation of meCbl increases the perinuclear clustering of oocyte mitochondria in WT  
 810 worms on OP50 bacteria at day 5. (D) Supplementation of meCbl does not shorten RLS of the  
 811 *sucg-1* mutant worms on OP50 bacteria. (E) Summary model representing mitochondrial GTP  
 812 metabolism and mitochondrial dynamics couple in the oocyte to regulate reproductive longevity,  
 813 which is modulated by metabolic inputs from bacteria.

814 (A, B) \*\*\*  $p < 0.001$  by log-rank test;  $n = 3$  biological independent replicates, ~20 worms per  
 815 replicate, see Supplementary Table 3 for full RLS Data. (C)  $n = 40$  (EV, D1),  $n = 45$  (128nM  
 816 meCbl, D1),  $n = 42$  (EV, D5),  $n = 38$  (128nM meCbl, D5); OP50 condition; 128nM meCbl vs EV,  
 817 n.s.  $p > 0.05$ , \*\*\*  $p < 0.001$  by Chi-squared test. (D) n.s.  $p > 0.05$  by log-rank test;  $n = 3$

818 biological independent replicates, ~80 worms per replicate split into 3 genotypes, see  
819 Supplementary Table 3 for full RLS Data.

820

821

822

823

824

825

826

827

828

829

830

831

832

833

834

835

836

837

838

839

840

841

842

843

844

845

846

847

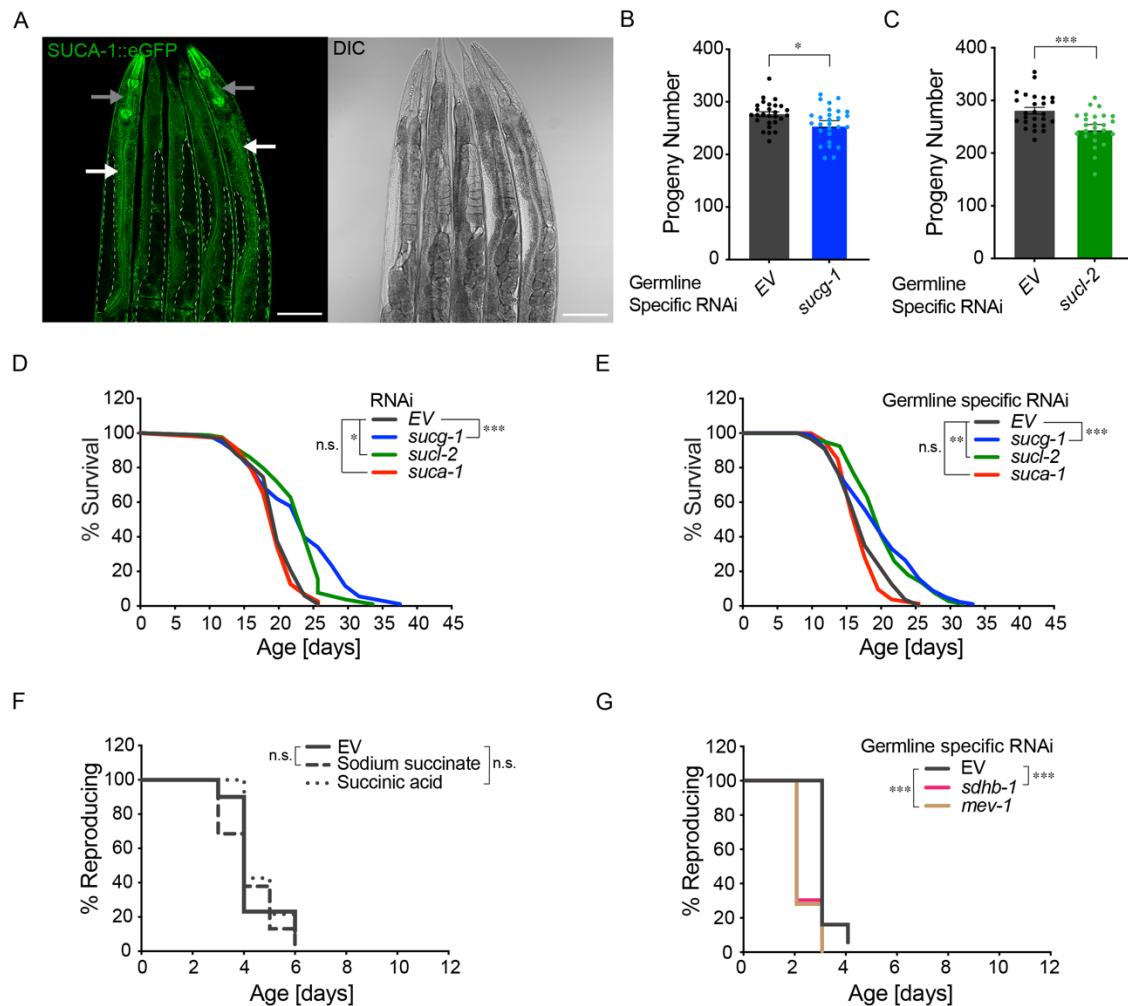

848

849 **Figure S1. The effect of SCS on reproduction and lifespan, the effect of succinate or**  
 850 **succinyl-CoA on RLS**

851 (A) Confocal imaging of the SUCA-1::eGFP knock-in line, in which the endogenous *suca-1* is  
 852 tagged with *egfp*, reveals its predominant expression in the intestine, pharynx, muscle,  
 853 hypodermis, and neurons, while only weak expression in the germline (Scale bar: 100µm; White  
 854 arrow: intestine; Gray arrow: neuron; Dashed white line: germline). (B, C) Germline-specific  
 855 RNAi knockdown of either *sucg-1* or *sucl-2* results in a slight decrease in progeny number. (D)  
 856 RNAi knockdown of *sucg-1* or *sucl-2*, but not *suca-1* slightly extends lifespan. (E) Germline-  
 857 specific RNAi knockdown of *sucg-1* or *sucl-2*, but not *suca-1* leads to a slight lifespan extension.  
 858 (F) Supplementation of either succinic acid or sodium succinate does not affect RLS of WT  
 859 worms. (G) Germline-specific RNAi knockdown of either *mev-1* or *sdhb-1* shortens RLS.

860 (B) n = 27 (EV), n = 27 (*sucg-1*); RNAi vs EV, \*  $p < 0.05$  by Student's t-test. (C) n = 26 (EV), n =  
 861 25 (*sucl-2*); RNAi vs EV, \*\*\*  $p < 0.001$  by Student's t-test. (D, E) n.s.  $p > 0.05$ , \*  $p < 0.05$ , \*\*  $p <$   
 862  $0.01$ , \*\*\*  $p < 0.001$  by log-rank test; n = 3 biological independent replicates, 70~120 worms per  
 863 replicate, see Supplementary Table 2 for full lifespan data. (F, G) n.s.  $p > 0.05$ , \*\*\*  $p < 0.001$  by  
 864 log-rank test; n = 3 biological independent replicates, ~20 worms per replicate, see  
 865 Supplementary Table 1 for full RLS Data.

866

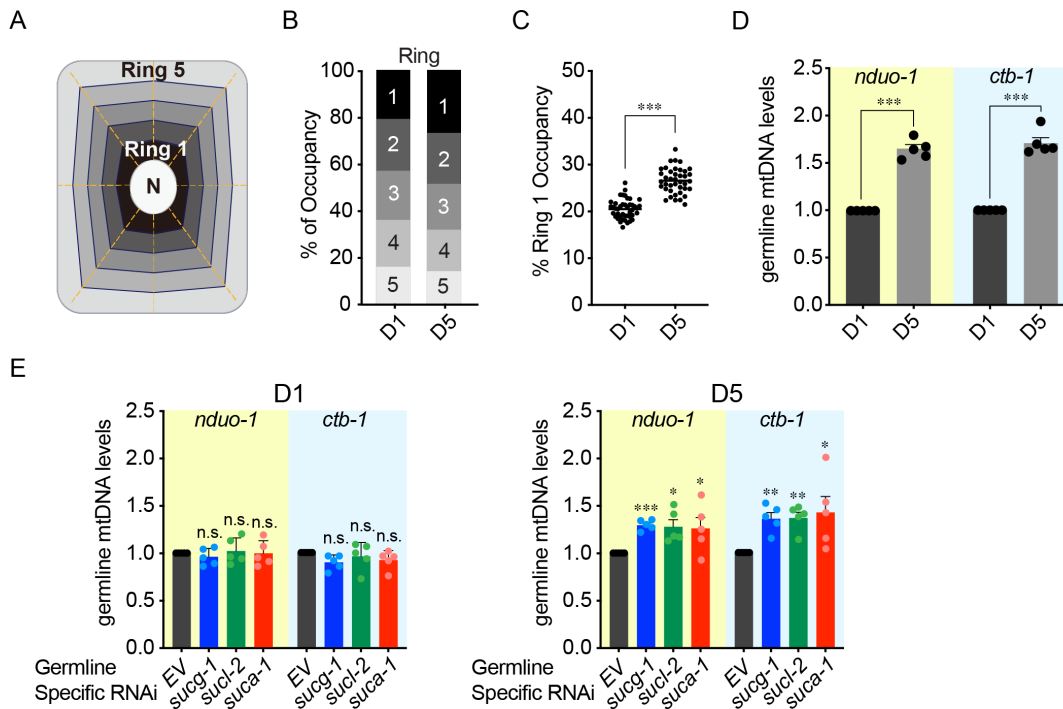

867

## 868 **Figure S2. Quantification of mitochondrial positioning and mtDNA levels**

869 (A) A computer algorithm is used to automatically divide oocytes into five rings, with ring 1  
 870 adjacent to the nucleus and ring 5 adjacent to the plasma membrane. (B) Mitochondrial GFP  
 871 signal intensity in each ring is measured to calculate the percentage of mitochondrial occupancy  
 872 at both day 1 and day 5. (C) The percentage of mitochondrial occupancy in ring 1 increased  
 873 from day 1 to day 5. (D) Germline mtDNA level is increased in WT worms from day 1 to day 5.  
 874 (E) Germline-specific RNAi knockdown of *sucg-1*, *sucl-2*, or *suca-1* does not affect the germline  
 875 mtDNA level at day 1 but causes an increase at day 5.

876 (C)  $n = 43$  (day 1) and  $n = 40$  (day 5); \*\*\*  $p < 0.001$  by Student's t-test. (D, E) n.s.  $p > 0.05$ , \*  $p <$   
 877  $0.05$ , \*\*  $p < 0.01$ , \*\*\*  $p < 0.001$  by Student's t-test adjusted with the Holm–Bonferroni method for  
 878 multiple comparisons;  $n = 5$  biological independent replicates.

879

880

881

882

883

884

885

886



887

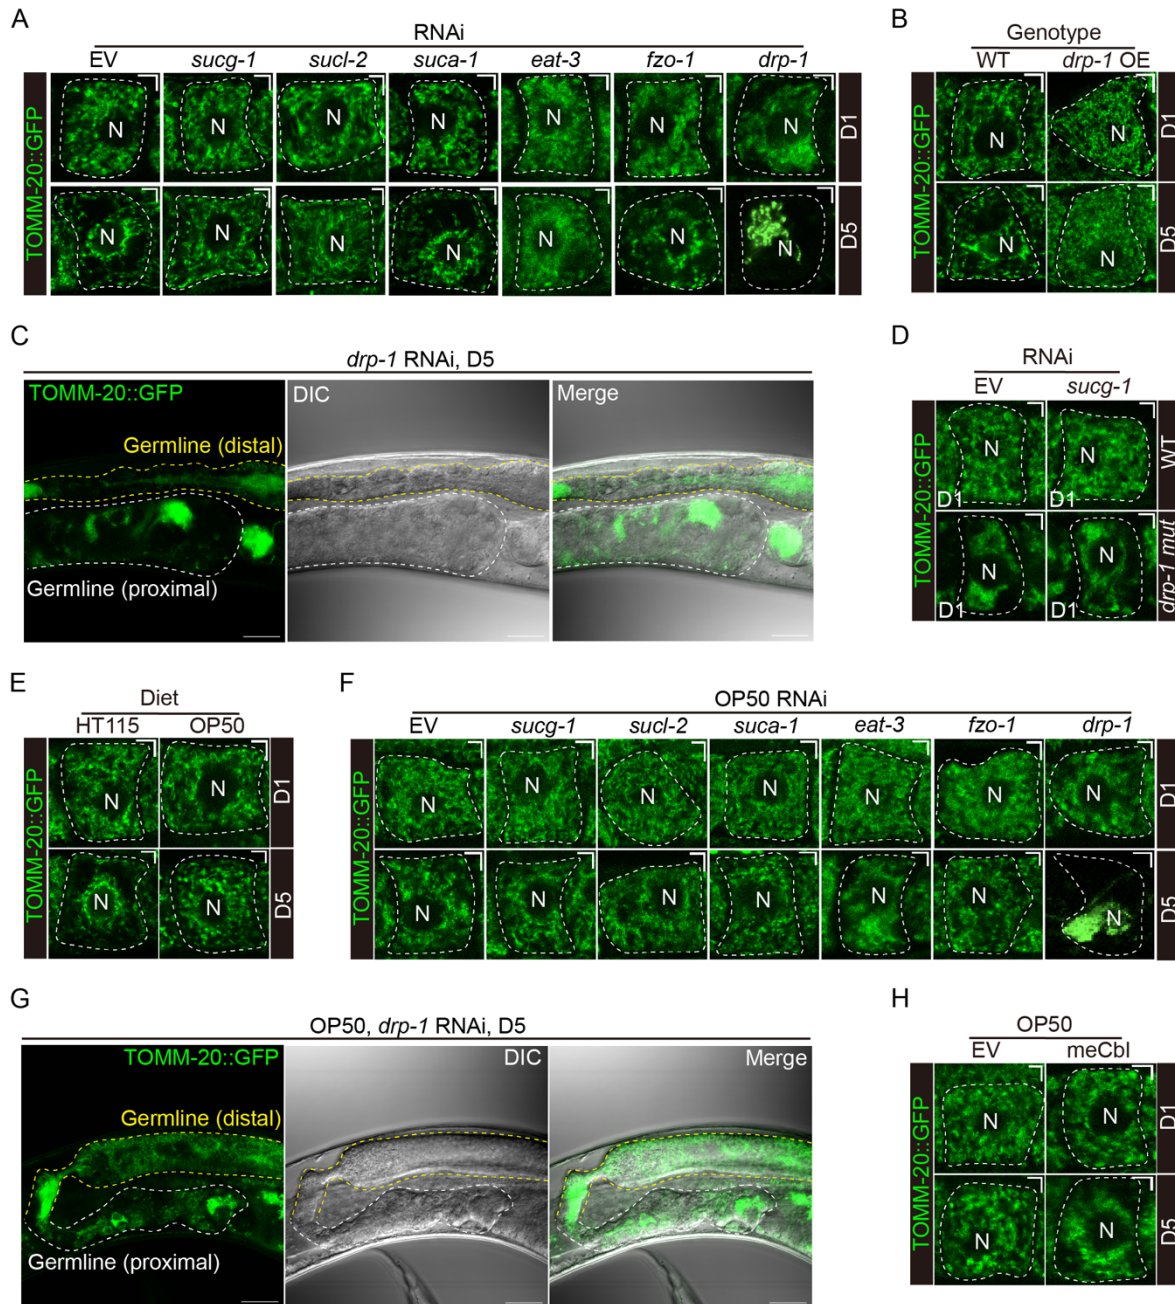

888

889 **Figure S3. Representative images showing oocyte mitochondrial distribution under**  
 890 **different conditions**

891 (A) Representative images reveal that RNAi inactivation of *sucg-1*, *sucl-2*, or *eat-3* but not *suca-*  
 892 *1* or *fzo-1* suppresses the perinuclear clustering of oocyte mitochondria in worms at day 5. Upon  
 893 *drp-1* RNAi knockdown, few oocytes with a recognizable cell boundary at day 5 show the one-  
 894 sided perinuclear clustering of mitochondria (Scale bar: 5µm; Dashed white line: oocyte outline;  
 895 N: nucleus). (B) Representative images of oocyte mitochondria show that the perinuclear  
 896 clustering distribution at day 5 is suppressed by the germline-specific overexpression of *drp-1*

897 (Scale bar: 5 $\mu$ m; Dashed white line: oocyte outline; N: nucleus). (C) Germline morphology and  
898 mitochondrial distribution of day 5 worms subjected to *drp-1* RNAi knockdown become largely  
899 disturbed and unorganized. (Scale bar: 30 $\mu$ m; Dashed white line: proximal germline; Dashed  
900 yellow line: distal germline). (D) Representative images reveal that RNAi inactivation of *sucg-1*  
901 does not suppress the perinuclear distribution of oocyte mitochondria in the *drp-1* mutant worms  
902 at day 1 (F, Scale bar: 5 $\mu$ m; Dashed white line: oocyte outline; N: nucleus). (E) Representative  
903 images of oocyte mitochondria show that the perinuclear clustering distribution at day 5 is  
904 suppressed in worms on OP50 bacteria compared to those on HT115 bacteria (Scale bar: 5 $\mu$ m;  
905 Dashed white line: oocyte outline; N: nucleus). (F) Representative images reveal that RNAi  
906 inactivation of *sucg-1*, *sucl-2*, *suca-1*, *eat-3* or *fzo-1* has no effect on the distribution of oocyte  
907 mitochondria in worms on OP50 bacteria at both day 1 and day 5. Upon *drp-1* RNAi knockdown,  
908 few oocytes with a recognizable cell boundary at day 5 show the one-sided perinuclear  
909 clustering of mitochondria (F, Scale bar: 5 $\mu$ m; Dashed white line: oocyte outline; N: nucleus).  
910 (G) With OP50 bacteria, germline morphology and mitochondrial distribution of day 5 worms  
911 subjected to *drp-1* RNAi knockdown become largely disturbed and unorganized. (Scale bar:  
912 30 $\mu$ m; Dashed white line: proximal germline; Dashed yellow line: distal germline). (H)  
913 Representative images reveal that meCbl supplementation induces the perinuclear clustering of  
914 oocyte mitochondria in worms on OP50 bacteria at day 5 (F, Scale bar: 5 $\mu$ m; Dashed white line:  
915 oocyte outline; N: nucleus).

916

917

918

919

920

921

922

923

924

925

926

927

928

929

930

931

932

933

934

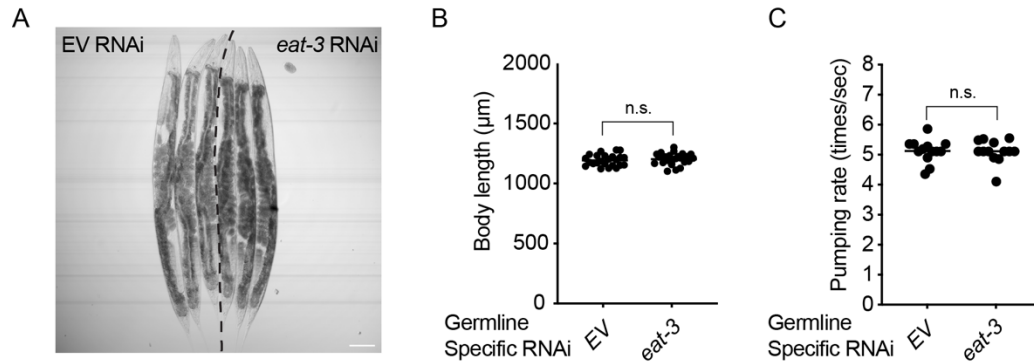

935

936 **Figure S4. Effects of germline-specific *eat-3* knockdown on body size and food intake**

937 (A, B) Germline-specific RNAi knockdown of *eat-3* does not affect the body size of day 1 worms,  
938 representative images are shown in A (Scale bar: 100µm), and the quantification results are  
939 shown in B. (C) The pharyngeal pumping rate of day 1 worms subjected to germline-specific  
940 RNAi knockdown of *eat-3* is not significantly different from the control.

941 (A, B)  $n = 24$  (EV),  $n = 24$  (*eat-3*); RNAi vs EV, n.s.  $p > 0.05$  by Student's t-test. (C)  $n = 13$  (EV),  
942  $n = 13$  (*eat-3*); RNAi vs EV, n.s.  $p > 0.05$  by Student's t-test.

943

944

945

946

947

948

949

950

951

952

953

954

955

956

957

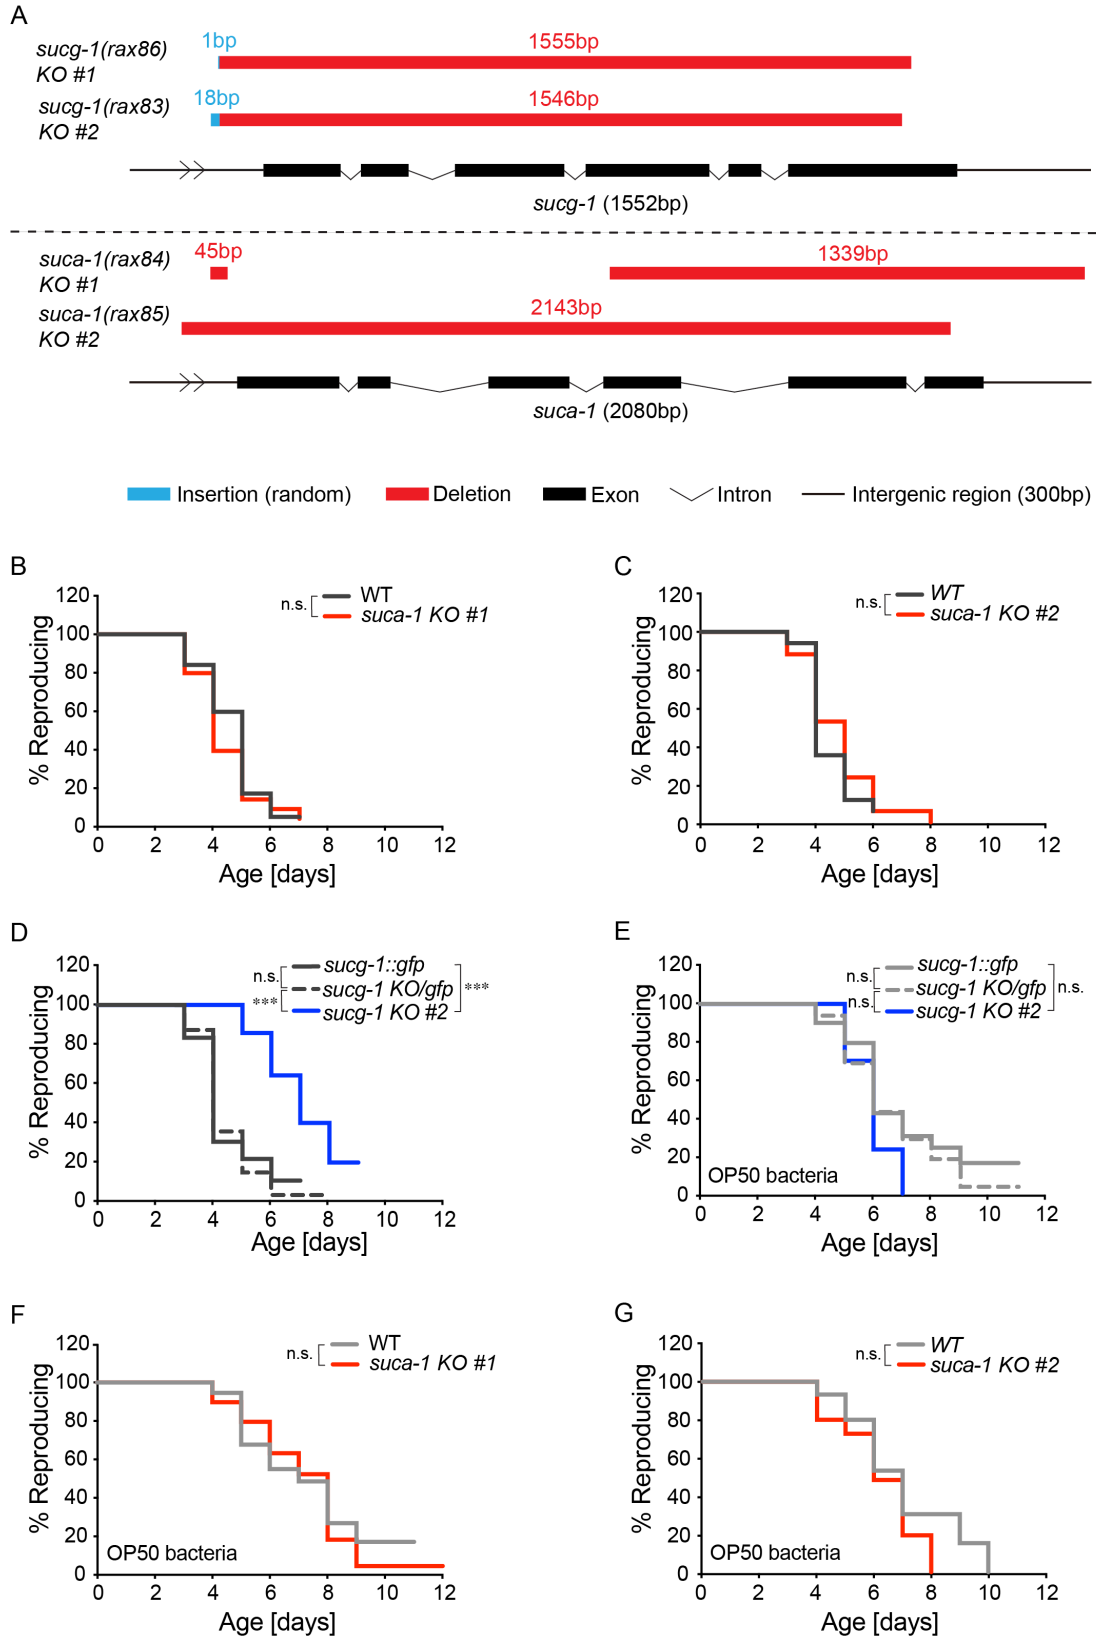

958

959 **Figure S5. Effects of SCS knockout on RLS under different bacterial conditions**

960 (A) A diagram showing the knockout (KO) lines of *sucg-1* and *suca-1* used in this study, *sucg-*  
961 *1(rax86)* is used in experiments shown in Main Figures. (B, C) *suca-1(rax84)* and *suca-1(rax85)*  
962 KO worms show no significant differences in RLS compared to WT worms. (D) *sucg-1(rax83)*  
963 KO mutants show a significant increase in RLS compared to *sucg-1::egfp* and *sucg-1 KO/egfp*  
964 worms. (E) With OP50 bacteria, *sucg-1(rax83)* KO mutants show no significant differences in  
965 RLS compared to *sucg-1::egfp* or *sucg-1 KO/egfp* worms. (F) With OP50 bacteria, *suca-*  
966 *1(rax84)* KO worms show no significant differences in RLS compared to WT animals. (G) With  
967 OP50 bacteria, *suca-1(rax85)* KO worms show no significant differences in RLS compared to  
968 WT animals.

969 (B, C, F, G) n.s.  $p > 0.05$  by log-rank test; n = 3 biological independent replicates, ~20 worms  
970 per replicate, see Supplementary Table 1 (B, C) and Supplementary Table 3 (F, G) for full RLS  
971 Data. (D, E) n.s.  $p > 0.05$ , \*\*\*  $p < 0.001$  by log-rank test; n = 3 biological independent replicates,  
972 ~80 worms per replicate split into 3 genotypes, see Supplementary Table 1 (D) and  
973 Supplementary Table 3 (E) for full RLS Data.

974

975

976

977

978

979

980

981

982

983

984

985

986

987

988

989

990

991

992

993

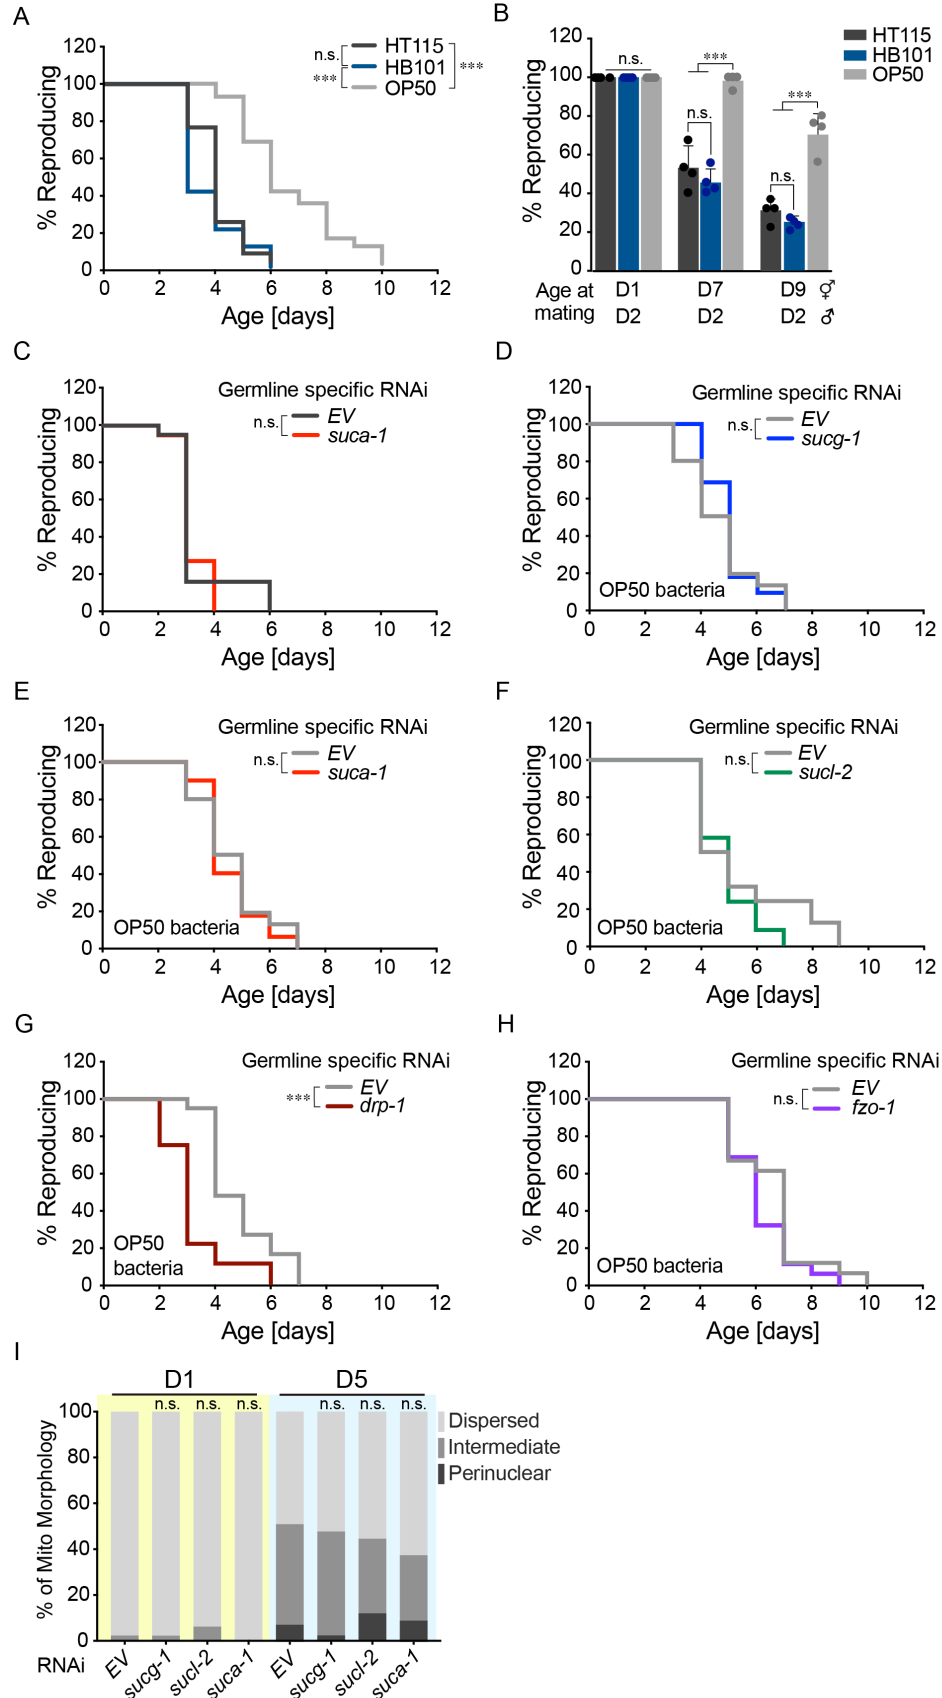

995 **Figure S6. RLS regulation under different bacterial conditions**

996 (A) WT worms on HT115 and HB101 show no significant differences in RLS, while WT worms  
997 with OP50 show significantly longer RLS compared to both HT115 and HB101. (B) Day 7 and 9  
998 WT hermaphrodites with OP50 show higher rates of reproduction than those with HT115 or  
999 HB101, when mated with day-2-old young males. (C) Germline-specific RNAi inactivation of  
1000 *suca-1* does not affect RLS in the background of HT115 bacteria. (D-F) With OP50 bacteria,  
1001 germline-specific RNAi inactivation of *sucg-1*, *sucl-2*, or *suca-1* does not extend RLS. (G)  
1002 Germline-specific RNAi inactivation of *drp-1* shortens RLS on OP50 bacteria. (H) Germline-  
1003 specific RNAi inactivation of *fzo-1* does not show significant differences in RLS on OP50  
1004 bacteria. (I) With OP50, RNAi inactivation of *sucg-1*, *sucl-2*, or *suca-1* has no effect on oocyte  
1005 mitochondrial distribution in worms at day 1 and day 5.

1006 (A, C, D, E, F, G, H) n.s.  $p > 0.05$ , \*\*\*  $p < 0.001$ , by log-rank test; n = 3 (A, C, E, F, G, H) or 4  
1007 (D) biological independent replicates, ~20 worms per replicate, see Supplementary Table 1 (C),  
1008 Supplementary Table 3 (D, E, F, G, H), and Supplementary Table 4 (A) for full RLS Data. (B)  
1009 Error bars represent mean  $\pm$  s.e.m., n = 4 biologically independent samples, n.s.  $p > 0.05$ , \*\*\*  $p$   
1010  $< 0.001$  by Fisher's exact test adjusted with the Holm–Bonferroni method for multiple  
1011 comparisons, ~15 worms per replicate. (I) n = 43 (EV, D1), n = 46 (*sucg-1*, D1), n = 45 (*sucl-2*,  
1012 D1), n = 45 (*suca-1*, D1), n = 43 (EV, D5), n = 42 (*sucg-1*, D5), n = 43 (*sucl-2*, D5) and n = 45  
1013 (*suca-1*, D5); OP50 condition; RNAi vs. EV, n.s.  $p > 0.05$  by Chi-squared test adjusted with the  
1014 Holm–Bonferroni method for multiple comparisons.

1015

1016

1017

1018

1019

1020

1021

1022

1023

1024

1025

1026

1027

1028

1029

1030

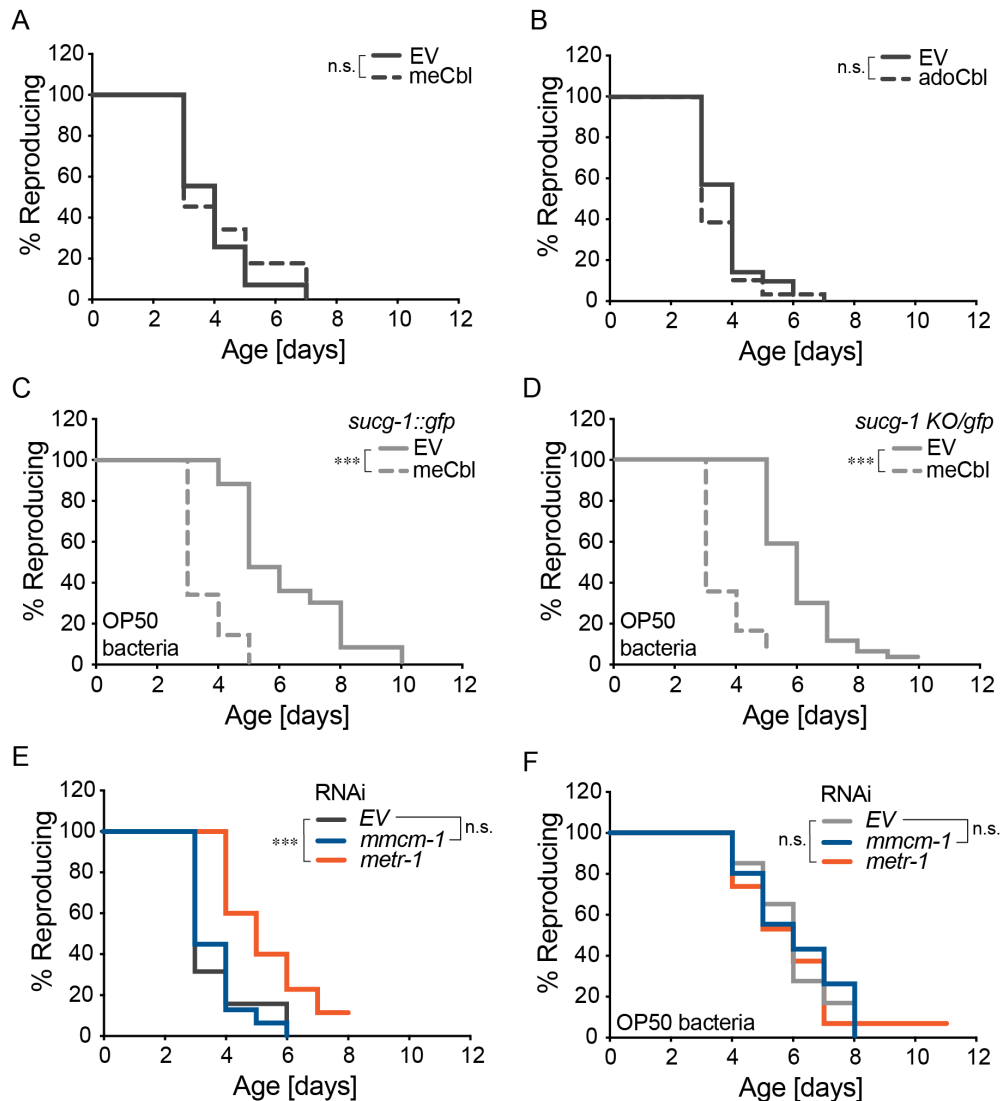

1031

1032 **Figure S7. VB12 and its downstream effectors mediate bacterial regulation of RLS**

1033 (A, B) Supplementation of meCbl or adoCbl does not alter RLS of WT worms on HT115  
1034 bacteria. (C, D) Supplementation of meCbl significantly shortened RLS of *sucg-1::gfp* and *sucg-*  
1035 *1 gfp/KO* control worms on OP50 bacteria. (E) On HT115 bacteria, WT worms subjected to  
1036 *metr-1*, but not *mmcm-1* RNAi knockdown show a significant increase in RLS compared to  
1037 those subjected to the EV control. (F) With OP50 bacteria, WT worms subjected to *mmcm-1* or  
1038 *metr-1* RNAi show no significant differences in RLS compared to those subjected to the EV  
1039 control.

1040 (A, B, E, F) n.s.  $p > 0.05$ , \*\*\*  $p < 0.001$  by log-rank test; n = 3 biological independent replicates,  
1041 ~20 worms per replicate, see Supplementary Table 1 (A, B, E) and Supplementary Table 3 (F)  
1042 for full RLS Data. (C, D) \*\*\*  $p < 0.001$  by log-rank test; n = 3 biological independent replicates,  
1043 ~80 worms per replicate split into 3 genotypes, see Supplementary Table 3 for full RLS Data.

1044



1045 **Materials and Methods**

1046 **Strains and maintenance**

1047 *C. elegans* strains N2, DCL569, EGD629, EGD623, EU2917, CA1472, and CU6372 were  
1048 obtained from the Caenorhabditis Genetics Center. PHX3617 and PHX4685 were acquired from  
1049 Suny Biotech. MCW618, MCW1220, MCW1315, MCW1325, MCW1326, MCW1329,  
1050 MCW1330, MCW1331, MW1357, MCW1373, MCW1375, MCW1385, MCW1408, MCW1473,  
1051 MCW1550, MCW1581, MCW1584 were made in our lab. All *C. elegans* strains were kept at  
1052 20°C for both maintenance and experiment. All *C. elegans* were non-starved for at least 2  
1053 generations on NGM plates seeded with OP50 bacteria before any experiment. The detailed  
1054 genotypes of each strain are listed in Supplementary Table 7.

1055 The *E. coli* strain HT115 (DE3) was obtained from the Ahringer RNAi library. The *E. coli* strains  
1056 OP50 and HB101 were obtained from the Caenorhabditis Genetics Center.

1057 **Strain generation – Extrachromosomal array**

1058 MCW618 (*raxEx190 [pie-1p::drp-1::tbb-2 3'UTR + myo-2p::GFP]*) was generated by  
1059 microinjecting the *pie-1p::drp-1::tbb-2 3'UTR* and *myo-2p::GFP* plasmids into the gonad of  
1060 young adults. MCW1581 (*raxEx618[pie-1p::cox8(mitochondrial targeting sequence)::ndk-*  
1061 *1::3xHA::pie-1 3'UTR + myo-2p::GFP]*) was generated by microinjecting *pie-*  
1062 *1p::cox8(mitochondrial targeting sequence)::ndk-1::3xHA::pie-1 3'UTR* PCR product and *myo-*  
1063 *2p::GFP* plasmid into the gonad of young adults.

1064 **Strain Generation – Integration of extrachromosomal array**

1065 MCW1220 (*raxIs141 [pie-1p::drp-1::tbb-2 3'UTR + myo-2p::GFP]*) was generated by the  
1066 integration of extrachromosomal array in MCW618 which is induced by gamma irradiation  
1067 exposures (4500rad, 5.9min) at the L4 stage. Later, the integrated progenies were backcrossed  
1068 to N2 five times.

1069 **Strain Generation – CRISPR-Cas9 mediated insertion and deletion**

1070 MCW1315 (*drp-1(rax82[GFP::Degron::drp-1]) IV*) was generated by inserting the Degron  
1071 sequence into the *GFP::drp-1* locus of EU2917 between *GFP* and *drp-1* following the protocol  
1072 from *Dokshin et al., 2018* with some modifications<sup>76</sup>. In short, a mixture of Cas9 protein  
1073 (1.25µg/µl), tracrRNA (1µg/µl), target crRNA (0.4µg/µl), *dpy-10* crRNA (0.16µg/µl), and partially  
1074 single-stranded DNA donor (300nM final concentration for each PCR product) was  
1075 microinjected into the gonad of young adults. The partially single-stranded DNA donor was  
1076 generated by mixing 2 PCR products – Degron sequence with 30 or 100 base pair homology  
1077 arms on each side, and heat to 95°C then gradually cooling back to 20°C for melting and  
1078 reannealing. After 3 days, the plates that have worms with *Dpy* phenotype were carefully  
1079 chosen as jackpot plates for individualization of non-*Dpy* worms. These worms were subjected  
1080 to pooled and then individual genotyping PCR after they reproduced to ensure passage of the  
1081 genotype. The progenies (F2) of the specific F1 worm with the desired genotype were further  
1082 individualized for identification of homozygosity using genotyping PCR and then sanger  
1083 sequencing.

1084 MCW1325(*sucg-1(rax83) IV*), MCW1331(*sucg-1(rax86) IV*), MCW1329(*suca-1(rax84) X*), and  
1085 MCW1330(*suca-1(rax85) X*) knockout or partial knockout strains were generated using

1086 methodologies described in *Chen et al., 2014* with modifications<sup>77</sup>. A mixture of Cas9 protein  
1087 (1.25µg/µl), tracrRNA (1µg/µl), 2 target crRNAs (0.4µg/µl each) on 5' and 3' of a gene, and *dpy-*  
1088 *10* crRNA (0.16µg/µl), were microinjected into the gonad of young adults. The screening  
1089 process was the same as described for the knock-in strain MCW1315. MCW1329 and  
1090 MCW1330 were backcrossed to N2 for three times.

1091 MCW1408 (*raxIs89[sun-1p::eGFP::sun-1 3'UTR] III*) was generated by inserting *sun-*  
1092 *1p::eGFP::sun-1 3'UTR* into ChrIII 7007.6. A mixture of Cas9 protein (1.25µg/µl), tracrRNA  
1093 (1µg/µl), target crRNA (0.4µg/µl), and partially single-stranded DNA donor (10nM final  
1094 concentration for each PCR product) was microinjected into the gonad of young adults. The  
1095 partially single-stranded DNA donor was generated by mixing 2 PCR products - *sun-*  
1096 *1p::eGFP::sun-1 3'UTR* sequence with 150bp of flanking homology arms on each side and the  
1097 plain *sun-1p::eGFP::sun-1 3'UTR* sequence (both amplified using pYT17 plasmid as template),  
1098 and heat to 95°C then gradually cool back to 20°C for melting and reannealing. Each injected  
1099 worms were individualized post-injection. After 4 days, F1s were screened under fluorescence  
1100 scope for green fluorescence in the germline. The progenies (F2) of the specific F1 worm with  
1101 the desired genotype were further individualized for identification of homozygosity using  
1102 fluorescence scope and then genotyping PCR followed by sanger sequencing.

1103 MCW1473 (*raxIs98[sun-1p::eGFP::3xHA::sun-1 3'UTR] III*) was generated by inserting triple HA  
1104 sequence between eGFP and *sun-1 3'UTR* at ChrIII 7007.6 position; *sun-1p::eGFP::sun-1*  
1105 *3'UTR* genetic locus in MCW1408. The experiment procedure was the same as generating  
1106 MCW1315 except for the usage of single-strand oligodeoxynucleotides (with 30~40nt homology  
1107 arms on each side; 250ng/µl final concentration) instead of partially single-stranded DNA donor  
1108 as the repair template, and melting and reannealing step by heating and cooling was not  
1109 performed.

1110 MCW1550 (*raxIs109[sun-1p::tomm-20(1-55aa)::eGFP::3xHA::sun-1 3'UTR] III*) as generated by  
1111 inserting the first 165 nucleotides of *tomm-20* gene between *sun-1p* and eGFP at ChrIII 7007.6  
1112 position; *sun-1p::eGFP::3xHA::sun-1 3'UTR* genetic locus in MCW1473. The experiment  
1113 procedure was the same as generating MCW1473. Later, MCW1550 was backcrossed to N2 for  
1114 five times.

1115 Genotyping PCR was performed using spanning primers for MCW1315, MCW1325, MCW1331,  
1116 MCW1329, MCW1330, and MCW1408, and then followed by confirmation with sanger  
1117 sequencing. For MCW1473 and MCW1550, genotyping PCR screen was performed using  
1118 spanning primer on the 5' and internal primer on the 3', and the candidates were further verified  
1119 using genotyping PCR by spanning primers followed by confirmation with sanger sequencing.

1120 All primers used for genotyping are listed in Supplementary Table 5. Sequences of all crRNAs  
1121 and the tracrRNA used for generating strains by CRISPR-Cas9 are listed in Supplementary  
1122 Table 6.

### 1123 **Strain Generation – Crossing**

1124 MCW1373 (*egxSi155 [mex-5p::tomm-20::mKate2::pie-1 3'UTR + unc-119(+)] II; unc-119(ed3)*  
1125 *III; sucg-1(syb3617[sucg-1::eGFP]) IV*) was generated by crossing PHX3617 male to EGD629  
1126 hermaphrodite. eGFP<sup>+</sup> F1s were selected to a population plate under the fluorescent scope, and  
1127 the eGFP<sup>+</sup> F2s on the population plate were then picked into individual plates. The F3s were  
1128 later examined for green fluorescence, and individual plates with all eGFP<sup>+</sup> (homozygous) F3

1129 worms were then selected. Confocal imaging was then used to screen for the *tomm-20::mKate2*  
1130 homozygous genotype, and genotyping PCR followed by sanger sequencing were used to  
1131 examine the *unc-119* genotype.

1132 MCW1326 (*ieSi68 [sun-1p::TIR1::mRuby::htp-1 3'UTR + Cbr-unc-119(+)] II; unc-119(ed3) III;*  
1133 *drp-1(rax82[GFP::Degron::drp-1]) IV*) was generated by crossing MCW1315 male to CA1472  
1134 hermaphrodite. F1s were picked into individual plates, and then the *GFP::Degron::drp-1; TIR-*  
1135 *1::mRuby* (heterozygous) genotype inspected by confocal imaging after egg laying. The F2s  
1136 from F1 with the correct heterozygous genotype were then picked into individual plates. Later,  
1137 F3s were later used to screen for the correct homozygous genotype of *GFP::Degron::drp-1;*  
1138 *TIR-1::mRuby* by confocal imaging. Lastly, genotyping PCR followed by sanger sequencing  
1139 were used to examine the *unc-119* genotype.

1140 MCW1357 (*raxIs141[pie-1p::drp-1.b::tbb-2 UTR + myo-2p::GFP]; egxSi152[mex5p::tomm-*  
1141 *20::GFP::pie-1 3'UTR + unc-119(+)] II; unc-119(ed3) III*) was generated by crossing EGD623  
1142 male to MCW1220 hermaphrodite. F1s were inspected for the *mex5p::tomm-20::GFP::pie-1*  
1143 *3'UTR* by the fluorescent microscope, and the worms with the correct (heterozygous) genotype  
1144 were individualized. Later, the *myo-2p::GFP<sup>+</sup>* F2s from F1 with the correct *mex5p::tomm-*  
1145 *20::GFP::pie-1 3'UTR* heterozygous genotype were then picked into individual plates. Later, F3s  
1146 were later used to screen for the correct homozygous genotype of *myo-2p::GFP* and  
1147 *mex5p::tomm-20::GFP::pie-1 3'UTR* by fluorescence scope. Lastly, genotyping PCR followed by  
1148 sanger sequencing were used to examine the *unc-119* genotype.

1149 MCW1584 (*egxSi152[mex5p::tomm-20::GFP::pie-1 3'UTR + unc-119(+)] II; unc-119(ed3) III;*  
1150 *drp-1(tm1108) IV*) was generated by crossing EGD623 male to CU6372 hermaphrodite. F1s  
1151 were then inspected for the *mex5p::tomm-20::GFP::pie-1 3'UTR* by fluorescent microscope, and  
1152 the one with the correct (heterozygous) genotype were individualized. The F2s from F1 with the  
1153 correct *mex5p::tomm-20::GFP::pie-1 3'UTR* heterozygous genotype were then picked into  
1154 individual plates, and single worm lysed for *drp-1(tm1108)* PCR genotyping after egg laying.  
1155 Later, F3s were used to screen for the correct homozygous genotype of *mex5p::tomm-*  
1156 *20::GFP::pie-1 3'UTR* by fluorescent microscope. Lastly, genotyping PCR followed by sanger  
1157 sequencing were used to examine the *unc-119* genotype.

1158 Genotyping PCR of for *drp-1(tm1108)* and *unc-119* was performed using spanning primers  
1159 followed by confirmation with sanger sequencing. The primers used for *drp-1(tm1108)* and *unc-*  
1160 *119* genotyping are listed in Supplementary Table 5.

1161 MCW1375 (*sucg-1(syb3617[sucg-1::eGFP]); sucg-1(rax83) IV*) and MCW1385 (*sucg-*  
1162 *1(syb3617[sucg-1::eGFP]); sucg-1(rax86) IV*) were obtained by crossing PHX3617 male to  
1163 MCW1325 or MCW1331 hermaphrodites. eGFP<sup>+</sup> F1s were picked under the fluorescent  
1164 microscope and picked into individual plates. Later, F2s were used to confirm the *sucg-*  
1165 *1::gfp/KO* heterozygous genotype of the F1 parental worms by fluorescent microscope  
1166 (eGFP<sup>+</sup>/eGFP<sup>-</sup> F2s should be around 3:1). Heterozygous genotypes were maintained by picked  
1167 eGFP<sup>+</sup> heterozygous worms (lower eGFP intensity than homozygous) for passage.

## 1168 RNA interference (RNAi) experiments

1169 RNAi libraries created by the lab of Dr. Marc Vidal and Dr. Julie Ahringer were used in this  
1170 study<sup>78,79</sup>. *sucg-1*, *mev-1*, *sdhb-1*, *ogdh-1*, *drp-1*, *eat-3*, and *mmcm-1* RNAi clones were  
1171 acquired from the Vidal library while *sucl-2*, *suca-1*, and *metr-1* RNAi clones were acquired from

1172 the Ahringer library. *fzo-1* RNAi clone was generated in the lab using L4440 as vector backbone  
1173 and full-length *fzo-1* transcript as insert. All RNAi clones were verified by Sanger sequencing.  
1174 For OP50 RNAi experiments, the genetically modified competent OP50 bacteria [*rnc14::DTn10*  
1175 *laczGA::T7pol camFRT*] generated by our lab (Neve *et al.*, 2019) was used and transformed with  
1176 50 ng of the RNAi plasmid every time before the experiment<sup>80</sup>. All RNAi colonies were selected  
1177 in both 50  $\mu\text{g ml}^{-1}$  carbenicillin and 50  $\mu\text{g ml}^{-1}$  tetracycline resistance. All RNAi bacteria were  
1178 cultured for 14 hours in LB with 25  $\mu\text{g ml}^{-1}$  carbenicillin, and then seeded onto RNAi agar plates  
1179 that contain 1 mM IPTG and 50  $\mu\text{g ml}^{-1}$  carbenicillin. The plates were then left at room  
1180 temperature overnight for induction of dsRNA expression. For the RNAi experiments that  
1181 require auxin treatment, fresh bacteria were concentrated 4 times before seeding onto the  
1182 plates, and then left in 4°C overnight before usage.

### 1183 **Construction of plasmid and fusion PCR product**

1184 The *pie-1p::drp-1::tbb2 3'UTR* plasmid was generated by PCR amplifying the complete coding  
1185 sequence of *drp-1.b* transcript from N2 cDNA and utilized Gateway BP recombination to clone  
1186 into pDONR221 which contains Gateway attLR recombination sequences. *drp-1.b* CDS entry  
1187 clone was then recombined with the entry clones pCM1.36-*tbb-2 3'UTR* and pCM1.127-*pie-1p*  
1188 into destination vector pCFJ150 using Gateway LR recombination.

1189 The *pie-1p::cox8(mitochondrial targeting sequence)::ndk-1::3xHA::pie-1 3'UTR* oligonucleotide  
1190 was generated by 3-fragment fusion PCR using *cox8(mitochondrial targeting sequence)::ndk-*  
1191 *1::3xHA*, *pie-1p*, and *pie-1 3'UTR* PCR product. *cox8(mitochondrial targeting sequence)::ndk-*  
1192 *1::3xHA* sequence was synthesized by IDT, and utilized as the template for amplification and  
1193 homology arm tagging (tagged with *pie-1p* and *pie-1 3'UTR* homologies on 5' and 3' end  
1194 respectively). Both *pie-1p* and *pie-1 3'UTR* PCR products were amplified using pPK605 plasmid  
1195 (Addgene) as the template.

1196 The pYT17-*sun-1p::eGFP::sun-1 3'UTR* plasmid was generated via 4-fragment Gibson cloning  
1197 from vector backbone, *sun-1p*, modified *eGFP*, and *sun-1 3'UTR* PCR products. *sun-1p* and  
1198 *sun-1 3'UTR* PCR products were amplified using N2 worm lysate as the template. Modified  
1199 *eGFP* PCR product was amplified using PHX3617 worm lysate as the template.

1200 Primers used for the amplification are listed in Supplementary Table 5.

### 1201 **Reproductive lifespan assay**

1202 Synchronized L1 larvae from egg preparation were plated onto 6cm NGM plates seeded with  
1203 the specific bacteria (default: HT115) and grew to L4 stage before being individualized into  
1204 single 3cm NGM plates. The worms were transferred to a new plate every day except for the  
1205 day right after individualization, which we collectively (L4 + day-1-old adult) count as day 1. The  
1206 transferring stopped when we observed 2 days of non-reproducing events consecutively or until  
1207 day 12. After each transfer, plates were stored at room temperature for 2 days before checking  
1208 the reproductive status. The last day of progeny production was counted as the day of  
1209 reproductive cessation, and worms that could not be tracked until the day of reproductive  
1210 cessation due to missing, death, germline protrusion, or internal hatching were counted as  
1211 censors on the last day which we could determine the reproductive status. The animals were  
1212 removed from the analysis if they died before producing any progeny. Statistical analyses were  
1213 performed in SPSS software using Kaplan-Meier survival method followed by a log-rank test.

1214 For RLS experiments of MCW1581 (*raxEx618[pie-1p::cox8(mitochondrial targeting*  
1215 *sequence)::ndk-1::3xHA::pie-1 3'UTR + myo-2p::GFP]*), day 1 *myo-2p::GFP<sup>+</sup>* F1s of injected  
1216 parental worms were individually picked onto EV or *sucg-1* RNAi plates. 3 and 4 days later, the  
1217 plates with *myo-2p::GFP<sup>+</sup>* F2s were selected, and the same number of *myo-2p::GFP<sup>+</sup>* and *myo-*  
1218 *2p::GFP<sup>-</sup>* F2 worms at L4 stage were picked from each population plate into individual EV or  
1219 *sucg-1* RNAi plates. The later part of the RLS methodology follows the protocol above.

1220 For RLS experiments of MCW1375 and MCW1385 strains, heterozygous parental worms were  
1221 individualized onto the 6cm NGM plates at day 1 adulthood and the plates were kept for 4 days.  
1222 The genotypes of the parental worms were then examined by the eGFP phenotypes in F1 under  
1223 the fluorescent scope to ensure heterozygosity (of the parental line), and F1 progenies at L4  
1224 stage were randomly picked and individualized onto 3cm NGM plates. The later part of the RLS  
1225 methodology follows protocol above, with an additional step of examining the genotype of each  
1226 F1 worm by observing the eGFP phenotypes in F2s.

### 1227 **Late fertility assay**

1228 Synchronized L1 larvae from egg preparation were plated on 6cm NGM plates seeded with the  
1229 specific bacteria (default: HT115) and transferred every 2 days to new NGM plates from L4 until  
1230 day 9. Individual hermaphrodites were transferred to a 3cm NGM plates seeded with OP50  
1231 bacteria together with 2 day-2-old young N2 males for mating. Hermaphrodites were mated for 2  
1232 days before the first round of examination, which will exclude the plates with dead  
1233 hermaphrodites, germline protruded hermaphrodites, or 2 dead males. The plates were then  
1234 kept for one more day until the second-round examination of progeny production. Unlike RLS,  
1235 internal hatched worms were not censored but instead considered as a reproduction event in  
1236 late fertility assay. 15-20 hermaphrodites were used for each experiment and was repeated at  
1237 least 3 times independently to reach 60 worms per condition (before exclusion). The results  
1238 from different trials were then pooled to conduct Fisher's exact test to determine whether the  
1239 number of worms that resumed reproduction after mating in each condition is significantly  
1240 different from the controls.

### 1241 **Confocal imaging**

1242 Sample preparations were done by anesthetizing the worms in 1% sodium azide (NaAz) in M9  
1243 buffer, mounted on 2% agarose pads on glass slides, and covered the pads with coverslips. The  
1244 worms were then imaged on laser scanning confocal FV3000 (Olympus, US) with water  
1245 immersion 60x objective (UPLSAPO 60XW, Olympus, US) for SUCG-1 mitochondrial  
1246 localization in the germline, germline morphology and mitochondrial localization of day 5 worms  
1247 subjected to *drp-1* RNAi knockdown, and oocyte mitochondrial distribution. 20x objective  
1248 (UPLSAPO 20X, Olympus, US) was used for assessing the expression pattern of SUCG-  
1249 1::eGFP and SUCA-1::eGFP, and intensity of SUCG-1::eGFP on day 1 and day 5. 10X  
1250 objective (UPlanFL N 10X, Olympus, US) was used to measure the body length of worms  
1251 subjected to EV or *eat-3* germline-specific RNAi knockdown.

### 1252 **Germline fluorescent intensity profiling**

1253 The images of the germline SUCG-1::eGFP were generated by 20x z-stacked confocal imaging  
1254 of PHX3617 strain. For a given 3D image stack of eGFP labeled germline, the max intensity at  
1255 each (x,y) location was projected to a single image,  $i_{\max}$ . Multiple polygons  $p_1, p_2, \dots, p_m$  ( $m$  is  
1256 the number of imaged germlines) were manually selected on  $i_{\max}$  to outline germlines. A 2D

1257 mask  $m_i$  was generated for each  $p_i$ , with  $i = 1, 2, \dots, m$ .  $m_i$  was extended to 3D mask  $v_i$  by  
1258 multiplying the depth of the stack and then use the  $v_i$  to selected 3D region for calculation total  
1259 and average intensity of eGFP. The region selected spans from the proliferation zone to the  
1260 mid-point of U-shaped loop due to technical difficulties of consistently getting quality image of  
1261 the entire germline and the blurred border between oocyte and spermatheca in aged worms. All  
1262 analyses above were done using MATLAB. Student's test was used to determine whether the  
1263 eGFP intensities of day-5-old worms are statistically distinct from the day-1-old worms. The  
1264 code for the analyses is provided in Supplementary File 1.

### 1265 **Analysis of oocyte mitochondrial network**

1266 The images of the oocyte mitochondrial network were generated by 60x confocal imaging of  
1267 EGD623 strain or mutant and integrated strains crossed with EGD623, and the position -2  
1268 oocytes were used for downstream analysis. Stacked oocytes with little distance between the  
1269 nuclear membrane and the lateral side of the plasma membrane were excluded from the  
1270 analysis.

1271 For code-based radial intensity profiling of oocyte mitochondrial network, mitochondrial  
1272 distribution as their distance from cell nucleus was quantified by generating two masks using  
1273 manual selection with polygon on the DIC images - polygon  $p_1$  outlining cell nucleus and  $p_2$   
1274 outlining cell body. A set of rays were calculated with their origins at the mass center of  $p_1$ . The  
1275 rays were customized to cover  $360^\circ$  with a step size of  $1^\circ$ . Each ray intersected with  $p_1$  and  $p_2$   
1276 and got a line segment. All line segments were divided into 5 equal segments, and labeled as  
1277  $ls_1, ls_2, \dots, ls_5$ , starting from the segment closest to cell nucleus. All ends of  $ls_1$  were connected  
1278 to get a ring shape  $r_1$ , and then the same for  $ls_2$  to  $ls_5$  resulting in  $r_2$  to  $r_5$ . These rings were used  
1279 as mask to select regions in an oocyte for mitochondrial intensity calculation leading to  
1280 generation of a radial mitochondrial distribution. All the above analyses were done using  
1281 MATLAB. The code for the analyses is provided in Supplementary File 2.

1282 Later, the ring 1 occupancy of each oocyte was converted into one of the three categories using  
1283 the following cutoffs – dispersed when lower than 23.5%, intermediate when equal or higher  
1284 than 23.5% but lower than 26.5%, and perinuclear when equal or higher than 26.5%. The  
1285 cutoffs were defined through double-blind categorization. Chi-squared test was then used to  
1286 determine whether the oocyte mitochondrial distribution of each condition is significantly  
1287 different from the control.

### 1288 **Germline mtDNA levels measurement by quantitative PCR (qPCR)**

1289 Around 30 germlines were dissected for each condition following the protocol from *Gervaise et*  
1290 *al., 2016*<sup>81</sup>. After dissection, germlines in M9 solution were collected into a PCR tube with a  
1291 glass Pasteur pipette, and centrifuged at 15000rpm for 2 minutes. Later, the excess M9 solution  
1292 was removed from the PCR tube, and worm lysis buffer was added. The PCR tube was then  
1293 placed at  $-80^\circ\text{C}$  for at least 15 minutes before incubating at  $60^\circ\text{C}$  for 60 minutes followed by  
1294  $95^\circ\text{C}$  for 15 minutes for lysis and DNA release. qPCR was then performed using Power SYBR  
1295 green master mix (Applied Biosystems #4367659) in a realplex 4 qPCR cycler (Eppendorf). To  
1296 calculate the relative mtDNA levels, the cycle number of *nduo-1* and *ctb-1* (both encoded by  
1297 mitochondrial DNA) were normalized to *ant-1.3* (encoded by genomic DNA).

### 1298 **Body length measurement**

1299 The DIC channel on confocal microscopy was used to image the full body lengths of day 1  
1300 worms subjected to EV or *eat-3* germline-specific RNAi knockdown side by side. The images  
1301 were then analyzed using ImageJ by drawing segmented lines spanning head to tail of the  
1302 worms, which was then followed by distance measurement.

### 1303 **Pharyngeal pumping measurement**

1304 A digital camera (ORCA-Flash4.0 LT, Hamamatsu) attached to the stereoscope was used to  
1305 record the pharyngeal pumping rate of worms subjected to EV or *eat-3* germline-specific RNAi  
1306 knockdown. After recording, the movies were played at 0.25X speed, and the times of  
1307 pharyngeal pumping in each second (pumping rate) were counted. For each worm, the average  
1308 pumping rate in 5-10 seconds was used for analysis.

### 1309 **Auxin treatment**

1310 Auxin (Alfa Aesar #A10556) was administered to the *C. elegans* using methodologies described  
1311 in *Zhang et al., 2015* with slight modification<sup>44</sup>. A 400mM auxin stock solution in ethanol was  
1312 prepared and filtered through a 0.22 $\mu$ m filter, which was stored at 4°C for up to 2 weeks. Auxin  
1313 stock solution was added into the NGM liquid agar with a concentration of 1 to 100 (1%) after  
1314 the autoclaved liquid agar drops below 50°C and then poured into the plates making a final  
1315 auxin concentration of 4mM. For the control plates, filtered ethanol was added to the NGM liquid  
1316 agar with a concentration of 1 to 100 (1%). The plates were stored at 4°C inside a box with low  
1317 photopermeability after the agar solidified. Before usage, fresh bacteria were concentrated by  
1318 4X before seeding onto the plates, and the plates that weren't used immediately were stored at  
1319 4°C for up to 5 days.

### 1320 **Germline mitochondrial GTP and ATP measurement**

1321 Synchronized MCW1550 L1 larvae from egg preparation were plated onto 15cm NGM plates  
1322 seeded with the 20X concentrated bacteria and grew to day 1. The worms were then harvested  
1323 (day 1 sample) or filtered daily (filter out eggs and progenies) using a 40 $\mu$ m cell strainer and  
1324 seeded onto new 15cm NGM plate until day 5 before getting harvested (day 5 sample).  
1325 Approximately 50k worms were used for day 5 sample collection and 100k worms were used for  
1326 day 1 sample collection.

1327 Germline mitochondria isolation was performed using methodologies described in *Ahier et al.,*  
1328 *2018*<sup>82</sup> with modifications. In short, worms were harvested into a 15cm centrifuge tube, and  
1329 washed 3 times with 10ml M9 buffer and then 2 more times with cold KPBS buffer (136mM KCl,  
1330 10mM KH<sub>2</sub>PO<sub>4</sub>, pH = 7.2). The worms were then transferred to a dauncer on ice and daunced  
1331 until most worms were clearly broken. Later, the lysates were transferred into a centrifuge tube  
1332 for low-speed centrifugation to precipitate large fragments, and the supernatant containing the  
1333 organelles was then collected and centrifuged again at high speed to precipitate the organelles.  
1334 The pellet was resuspended in KPBS buffer, anti-HA magnetic beads (Pierce #88837) were  
1335 added, and the tube was incubated at 4°C for an hour to ensure binding efficiency. The anti-HA  
1336 magnetic beads were then washed three times with KPBS, portioned out for protein  
1337 concentration measurement by BCA assay and mitochondrial DNA content detection by qPCR,  
1338 and the remaining beads were stored at -80°C for later steps of GTP and ATP detection.

1339 For detection of nucleotides, immunoprecipitated mitochondria (with around 100 to 200 $\mu$ g  
1340 mitochondria protein) were resuspended in pre-chilled water to the concentration of 1 $\mu$ g

1341 mitochondria protein per  $\mu\text{l}$  water. 500 $\mu\text{l}$  pre-chilled chloroform was then immediately added to  
1342 the resuspended mitochondria samples, followed by vigorous vortexing to quench metabolism  
1343 and to extract soluble metabolites. The mitochondria extracts were centrifuged at 20,000g for  
1344 10min at 4°C to remove the organic phase, followed by another centrifugation at 20,000g for  
1345 10min at 4°C to remove cell debris. The resulting supernatants were diluted 10 times (to 0.1 $\mu\text{g}$   
1346 mitochondria protein per  $\mu\text{l}$  water) and analyzed immediately using HPLC-MS as described  
1347 previously<sup>83,84</sup>.

1348 Data analysis was performed using the Metabolomics Analysis and Visualization Engine  
1349 (MAVEN) software<sup>85</sup>. For each sample, ion counts of nucleotides were normalized to  
1350 mitochondrial protein mass concentration followed by mtDNA (*nduo-1*) level. All samples were  
1351 then normalized to the (HT115 bacteria; D1) condition to indicate fold changes.

### 1352 **Cobalamin treatment**

1353 Methylcobalamin (Sigma-Aldrich #M9756) and adenosylcobalamin (Sigma-Aldrich #C0884)  
1354 were administered to the *C. elegans* using methodologies similar to auxin treatment. A 1.28mM  
1355 aqueous stock solution was freshly prepared and filtered through a 0.22 $\mu\text{m}$  filter. The stock  
1356 solution was added into the NGM liquid agar with a concentration of 1 to 10000 (0.01%) after  
1357 the autoclaved liquid agar drops below 50°C and then poured into the plates making a final  
1358 cobalamin concentration of 128nM. For the control plates, filtered double-distilled water was  
1359 added to the NGM liquid agar instead. The plates were stored at 4°C inside a box with low  
1360 photopermeability after the agar solidified. Bacteria were seeded before usage, and the plates  
1361 that weren't used immediately were stored at 4°C for up to 5 days.

### 1362 **Succinate treatment**

1363 Sodium succinate (Sigma Aldrich #S2378) and succinic acid (Thermo Scientific Chemicals  
1364 #AA3327236) were administered to the *C. elegans* via supplementation into the NGM plates.  
1365 Precalculated amounts of sodium succinate and succinic acid were added into the liquid agar  
1366 right after being taken out from the autoclave to make 10mM final concentration, and the agar  
1367 was then poured into the plates after cooling down. The plates were stored at 4°C inside a box  
1368 with low photopermeability after the agar solidified. Bacteria were seeded before usage.

### 1369 **QUANTIFICATION AND STATISTICAL ANALYSIS**

1370 The reproductive lifespan analyses were performed using Kaplan-Meier survival analysis and a  
1371 log-rank test in the SPSS. Chi-squared tests and Fisher's exact tests were performed in  
1372 Graphpad PRISM to compare categorical variables, and Holm-Bonferroni method was used for  
1373 correction as indicated in the corresponding figure legends. Student's t-test (unpaired) were  
1374 performed in Excel to compare the mean of different samples, and Holm-Bonferroni method was  
1375 used for correction as indicated in the corresponding figure legends. For all figure legends,  
1376 asterisks indicate statistical significance as follows: n.s. = not significant  $p>0.05$ ; \*  $p<0.05$ ; \*\*  
1377  $p<0.01$ ; \*\*\*  $p<0.001$ . Data were collected from at least three independent biological replicates.  
1378 Figures and graphs were constructed using BioRender, PRISM, and Illustrator.

### 1380 **ACKNOWLEDGMENT**

1381  
1382 This work was supported by NIH grants R01AG045183 (M.C.W.), R01AT009050 (M.C.W.),  
1383 R01AG062257 (M.C.W.), DP1DK113644 (M.C.W.), March of Dimes Foundation (M.C.W.),  
1384 Welch Foundation (M.C.W.), HHMI investigator (M.C.W.), American Federation for Aging



1385 Research (Y.L.). We thank P. Svay for maintenance support and C. Huang for technical  
1386 support. We thank I. Neve and H. Oakley for conducting preliminary screening of this study. We  
1387 thank Dr. Bruce Bowerman for providing the *drp-1* endogenous locus sequence information of  
1388 the EU2917 strain. We thank BioRender for the support on creating Fig 1A, Fig 3A, and Fig 4A.  
1389 We thank the Caenorhabditis Genetics Center (CGC) for *C. elegans* strains.

#### 1390 **AUTHOR CONTRIBUTIONS**

1391 Y.L., J.S., and M.C.W. conceived the project. Y.L., M.Savini., T.C., J.Y., Q.Z., L.D., M.Senturk,  
1392 and J.S. performed experiments. T.C. and S.G. wrote the code for imaging analysis. Y.L and  
1393 M.C.W. wrote the manuscript. Y.L., J.J.W. and M.C.W. edited the manuscript.

1394

1395

1396

1397

1398

1399

1400

1401

1402

1403

1404

1405

1406

1407

1408

1409

1410

1411

1412

1413

1414

1415

1416

1417 **REFERENCES**

- 1418 1. Hamilton, B., Martin, J. & Osterman, M. *Births: Provisional Data for 2020*.  
1419 <https://stacks.cdc.gov/view/cdc/104993> (2021) doi:10.15620/cdc:104993.
- 1420 2. Duncan, F. E. & Gerton, J. L. Mammalian oogenesis and female reproductive aging. *Aging*  
1421 *(Albany NY)* **10**, 162–163 (2018).
- 1422 3. te Velde, E. R. The variability of female reproductive ageing. *Human Reproduction Update*  
1423 **8**, 141–154 (2002).
- 1424 4. Babayev, E. & Seli, E. Oocyte mitochondrial function and reproduction. *Curr Opin Obstet*  
1425 *Gynecol* **27**, 175–181 (2015).
- 1426 5. May-Panloup, P., Boguenet, M., El Hachem, H., Bouet, P.-E. & Reynier, P. Embryo and Its  
1427 Mitochondria. *Antioxidants* **10**, 139 (2021).
- 1428 6. Wilding, M. *et al.* Mitochondrial aggregation patterns and activity in human oocytes and  
1429 preimplantation embryos. *Human Reproduction* **16**, 909–917 (2001).
- 1430 7. Reynier, P. *et al.* Mitochondrial DNA content affects the fertilizability of human oocytes. *Mol*  
1431 *Hum Reprod* **7**, 425–429 (2001).
- 1432 8. Van Blerkom, J., Davis, P. W. & Lee, J. ATP content of human oocytes and developmental  
1433 potential and outcome after in-vitro fertilization and embryo transfer. *Hum Reprod* **10**, 415–  
1434 424 (1995).
- 1435 9. Detmer, S. A. & Chan, D. C. Functions and dysfunctions of mitochondrial dynamics. *Nat*  
1436 *Rev Mol Cell Biol* **8**, 870–879 (2007).
- 1437 10. Udagawa, O. *et al.* Mitochondrial Fission Factor Drp1 Maintains Oocyte Quality via Dynamic  
1438 Rearrangement of Multiple Organelles. *Current Biology* **24**, 2451–2458 (2014).
- 1439 11. Wakai, T., Harada, Y., Miyado, K. & Kono, T. Mitochondrial dynamics controlled by  
1440 mitofusins define organelle positioning and movement during mouse oocyte maturation.  
1441 *MHR: Basic science of reproductive medicine* **20**, 1090–1100 (2014).

- 1442 12. Hou, X. *et al.* Mitofusin1 in oocyte is essential for female fertility. *Redox Biology* **21**, 101110  
1443 (2019).
- 1444 13. Zhang, M. *et al.* Mitofusin 1 is required for female fertility and to maintain ovarian follicular  
1445 reserve. *Cell Death Dis* **10**, 560 (2019).
- 1446 14. Han, B. *et al.* Microbial Genetic Composition Tunes Host Longevity. *Cell* **169**, 1249-  
1447 1262.e13 (2017).
- 1448 15. Weir, H. J. *et al.* Dietary Restriction and AMPK Increase Lifespan via Mitochondrial Network  
1449 and Peroxisome Remodeling. *Cell Metab* **26**, 884-896.e5 (2017).
- 1450 16. Rana, A. *et al.* Promoting Drp1-mediated mitochondrial fission in midlife prolongs healthy  
1451 lifespan of *Drosophila melanogaster*. *Nat Commun* **8**, 448 (2017).
- 1452 17. Luo, S., Kleemann, G. A., Ashraf, J. M., Shaw, W. M. & Murphy, C. T. TGF- $\beta$  and Insulin  
1453 Signaling Regulate Reproductive Aging via Oocyte and Germline Quality Maintenance. *Cell*  
1454 **143**, 299–312 (2010).
- 1455 18. Hughes, S. E., Evason, K., Xiong, C. & Kornfeld, K. Genetic and Pharmacological Factors  
1456 That Influence Reproductive Aging in Nematodes. *PLOS Genetics* **3**, e25 (2007).
- 1457 19. Sowa, J. N., Mutlu, A. S., Xia, F. & Wang, M. C. Olfaction Modulates Reproductive Plasticity  
1458 through Neuroendocrine Signaling in *Caenorhabditis elegans*. *Curr. Biol.* **25**, 2284–2289  
1459 (2015).
- 1460 20. Wang, M. C., Oakley, H. D., Carr, C. E., Sowa, J. N. & Ruvkun, G. Gene Pathways That  
1461 Delay *Caenorhabditis elegans* Reproductive Senescence. *PLOS Genetics* **10**, e1004752  
1462 (2014).
- 1463 21. Martínez-Reyes, I. & Chandel, N. S. Mitochondrial TCA cycle metabolites control physiology  
1464 and disease. *Nat Commun* **11**, 102 (2020).
- 1465 22. Johnson, J. D., Muhonen, W. W. & Lambeth, D. O. Characterization of the ATP- and GTP-  
1466 specific Succinyl-CoA Synthetases in Pigeon: THE ENZYMES INCORPORATE THE SAME  
1467  $\alpha$ -SUBUNIT \*. *Journal of Biological Chemistry* **273**, 27573–27579 (1998).

- 1468 23. Fraser, M. E., Hayakawa, K., Hume, M. S., Ryan, D. G. & Brownie, E. R. Interactions of  
1469 GTP with the ATP-grasp Domain of GTP-specific Succinyl-CoA Synthetase \*. *Journal of*  
1470 *Biological Chemistry* **281**, 11058–11065 (2006).
- 1471 24. Lambeth, D. O., Tews, K. N., Adkins, S., Frohlich, D. & Milavetz, B. I. Expression of Two  
1472 Succinyl-CoA Synthetases with Different Nucleotide Specificities in Mammalian Tissues \*.  
1473 *Journal of Biological Chemistry* **279**, 36621–36624 (2004).
- 1474 25. Kibbey, R. G. *et al.* Mitochondrial GTP Regulates Glucose-Stimulated Insulin Secretion. *Cell*  
1475 *Metabolism* **5**, 253–264 (2007).
- 1476 26. Jesinkey, S. R. *et al.* Mitochondrial GTP Links Nutrient Sensing to  $\beta$  Cell Health,  
1477 Mitochondrial Morphology, and Insulin Secretion Independent of OxPhos. *Cell Reports* **28**,  
1478 759-772.e10 (2019).
- 1479 27. Zhao, Y. *et al.* Loss of succinyl-CoA synthase ADP-forming  $\beta$  subunit disrupts mtDNA  
1480 stability and mitochondrial dynamics in neurons. *Sci Rep* **7**, 7169 (2017).
- 1481 28. Wu, B. *et al.* Succinyl-CoA Ligase Deficiency in Pro-inflammatory and Tissue-Invasive T  
1482 Cells. *Cell Metabolism* **32**, 967-980.e5 (2020).
- 1483 29. Zou, L. *et al.* Construction of a germline-specific RNAi tool in *C. elegans*. *Sci Rep* **9**, 2354  
1484 (2019).
- 1485 30. Gems, D. *et al.* Two pleiotropic classes of *daf-2* mutation affect larval arrest, adult behavior,  
1486 reproduction and longevity in *Caenorhabditis elegans*. *Genetics* **150**, 129–155 (1998).
- 1487 31. Ng, L. T. *et al.* Lifespan and healthspan benefits of exogenous H<sub>2</sub>S in *C. elegans* are  
1488 independent from effects downstream of *eat-2* mutation. *NPJ Aging Mech Dis* **6**, 6 (2020).
- 1489 32. Luo, S., Shaw, W. M., Ashraf, J. & Murphy, C. T. TGF-beta Sma/Mab signaling mutations  
1490 uncouple reproductive aging from somatic aging. *PLoS Genet* **5**, e1000789 (2009).
- 1491 33. Lakowski, B. & Hekimi, S. The genetics of caloric restriction in *Caenorhabditis elegans*. *Proc*  
1492 *Natl Acad Sci U S A* **95**, 13091–13096 (1998).

- 1493 34. Kenyon, C., Chang, J., Gensch, E., Rudner, A. & Tabtiang, R. A *C. elegans* mutant that  
1494 lives twice as long as wild type. *Nature* **366**, 461–464 (1993).
- 1495 35. Fan, X. *et al.* SapTrap Assembly of *Caenorhabditis elegans* MosSCI Transgene Vectors. *G3*  
1496 (*Bethesda*) **10**, 635–644 (2019).
- 1497 36. Boissan, M. *et al.* Membrane trafficking. Nucleoside diphosphate kinases fuel dynamin  
1498 superfamily proteins with GTP for membrane remodeling. *Science* **344**, 1510–1515 (2014).
- 1499 37. Westermann, B. Mitochondrial dynamics in model organisms: What yeasts, worms and flies  
1500 have taught us about fusion and fission of mitochondria. *Seminars in Cell & Developmental*  
1501 *Biology* **21**, 542–549 (2010).
- 1502 38. Kanazawa, T. *et al.* The *C. elegans* Opa1 Homologue EAT-3 Is Essential for Resistance to  
1503 Free Radicals. *PLOS Genetics* **4**, e1000022 (2008).
- 1504 39. Ichishita, R. *et al.* An RNAi screen for mitochondrial proteins required to maintain the  
1505 morphology of the organelle in *Caenorhabditis elegans*. *J Biochem* **143**, 449–454 (2008).
- 1506 40. Avery, L. The genetics of feeding in *Caenorhabditis elegans*. *Genetics* **133**, 897–917  
1507 (1993).
- 1508 41. Breckenridge, D. G. *et al.* *Caenorhabditis elegans* drp-1 and fis-2 regulate distinct cell-death  
1509 execution pathways downstream of ced-3 and independent of ced-9. *Mol Cell* **31**, 586–597  
1510 (2008).
- 1511 42. Tan, F. J. *et al.* CED-9 and mitochondrial homeostasis in *C. elegans* muscle. *J Cell Sci* **121**,  
1512 3373–3382 (2008).
- 1513 43. Lowry, J. *et al.* High-Throughput Cloning of Temperature-Sensitive *Caenorhabditis elegans*  
1514 Mutants with Adult Syncytial Germline Membrane Architecture Defects. *G3 (Bethesda)* **5**,  
1515 2241–2255 (2015).
- 1516 44. Zhang, L., Ward, J. D., Cheng, Z. & Dernburg, A. F. The auxin-inducible degradation (AID)  
1517 system enables versatile conditional protein depletion in *C. elegans*. *Development* **142**,  
1518 4374–4384 (2015).

- 1519 45. Watson, E. *et al.* Interspecies systems biology uncovers metabolites affecting *C. elegans*  
1520 gene expression and life history traits. *Cell* **156**, 759–770 (2014).
- 1521 46. Wei, W. & Ruvkun, G. Lysosomal activity regulates *Caenorhabditis elegans* mitochondrial  
1522 dynamics through vitamin B12 metabolism. *Proc Natl Acad Sci U S A* **117**, 19970–19981  
1523 (2020).
- 1524 47. Revtovich, A. V., Lee, R. & Kirienko, N. V. Interplay between mitochondria and diet  
1525 mediates pathogen and stress resistance in *Caenorhabditis elegans*. *PLoS Genet* **15**,  
1526 e1008011 (2019).
- 1527 48. Ghergurovich, J. M. *et al.* Methionine synthase supports tumour tetrahydrofolate pools. *Nat*  
1528 *Metab* **3**, 1512–1520 (2021).
- 1529 49. Sullivan, M. R. *et al.* Methionine synthase is essential for cancer cell proliferation in  
1530 physiological folate environments. *Nat Metab* **3**, 1500–1511 (2021).
- 1531 50. Cota, V., Sohrabi, S., Kaletsky, R. & Murphy, C. T. Oocyte mitophagy is critical for extended  
1532 reproductive longevity. *PLoS Genet* **18**, e1010400 (2022).
- 1533 51. Baixauli, F. *et al.* The mitochondrial fission factor dynamin-related protein 1 modulates T-cell  
1534 receptor signalling at the immune synapse. *EMBO J* **30**, 1238–1250 (2011).
- 1535 52. Hennings, T. G. *et al.* In Vivo Deletion of  $\beta$ -Cell Drp1 Impairs Insulin Secretion Without  
1536 Affecting Islet Oxygen Consumption. *Endocrinology* **159**, 3245–3256 (2018).
- 1537 53. Griparic, L., van der Wel, N. N., Orozco, I. J., Peters, P. J. & van der Bliek, A. M. Loss of the  
1538 intermembrane space protein Mgm1/OPA1 induces swelling and localized constrictions  
1539 along the lengths of mitochondria. *J Biol Chem* **279**, 18792–18798 (2004).
- 1540 54. Pich, S. *et al.* The Charcot-Marie-Tooth type 2A gene product, Mfn2, up-regulates fuel  
1541 oxidation through expression of OXPHOS system. *Hum Mol Genet* **14**, 1405–1415 (2005).
- 1542 55. Shen, T. *et al.* Mitofusin-2 is a major determinant of oxidative stress-mediated heart muscle  
1543 cell apoptosis. *J Biol Chem* **282**, 23354–23361 (2007).

- 1544 56. Rojo, M., Legros, F., Chateau, D. & Lombès, A. Membrane topology and mitochondrial  
1545 targeting of mitofusins, ubiquitous mammalian homologs of the transmembrane GTPase  
1546 Fzo. *J Cell Sci* **115**, 1663–1674 (2002).
- 1547 57. Santel, A. & Fuller, M. T. Control of mitochondrial morphology by a human mitofusin. *J Cell*  
1548 *Sci* **114**, 867–874 (2001).
- 1549 58. Al-Mehdi, A.-B. *et al.* Perinuclear mitochondrial clustering creates an oxidant-rich nuclear  
1550 domain required for hypoxia-induced transcription. *Sci Signal* **5**, ra47 (2012).
- 1551 59. Agarwal, S. & Ganesh, S. Perinuclear mitochondrial clustering, increased ROS levels, and  
1552 HIF1 are required for the activation of HSF1 by heat stress. *J Cell Sci* **133**, jcs245589  
1553 (2020).
- 1554 60. Kim, S. *et al.* Hepatitis B virus x protein induces perinuclear mitochondrial clustering in  
1555 microtubule- and Dynein-dependent manners. *J Virol* **81**, 1714–1726 (2007).
- 1556 61. Hu, M. *et al.* Respiratory syncytial virus co-opts host mitochondrial function to favour  
1557 infectious virus production. *Elife* **8**, e42448 (2019).
- 1558 62. Pucci, B. *et al.* Detailing the role of Bax translocation, cytochrome c release, and perinuclear  
1559 clustering of the mitochondria in the killing of HeLa cells by TNF. *J Cell Physiol* **217**, 442–  
1560 449 (2008).
- 1561 63. Dewitt, D. A. *et al.* Peri-nuclear clustering of mitochondria is triggered during aluminum  
1562 maltolate induced apoptosis. *J Alzheimers Dis* **9**, 195–205 (2006).
- 1563 64. Thomas, W. D., Zhang, X. D., Franco, A. V., Nguyen, T. & Hersey, P. TNF-related  
1564 apoptosis-inducing ligand-induced apoptosis of melanoma is associated with changes in  
1565 mitochondrial membrane potential and perinuclear clustering of mitochondria. *J Immunol*  
1566 **165**, 5612–5620 (2000).
- 1567 65. Geisler, S. *et al.* PINK1/Parkin-mediated mitophagy is dependent on VDAC1 and  
1568 p62/SQSTM1. *Nat Cell Biol* **12**, 119–131 (2010).

- 1569 66. Mishra, P. & Chan, D. C. Metabolic regulation of mitochondrial dynamics. *J Cell Biol* **212**,  
1570 379–387 (2016).
- 1571 67. Bulutoglu, B., Garcia, K. E., Wu, F., Minteer, S. D. & Banta, S. Direct Evidence for  
1572 Metabolon Formation and Substrate Channeling in Recombinant TCA Cycle Enzymes. *ACS*  
1573 *Chem. Biol.* **11**, 2847–2853 (2016).
- 1574 68. Hatefi, Y. [6] Resolution of complex II and isolation of succinate dehydrogenase (EC  
1575 1.3.99.1). in *Methods in Enzymology* (eds. Fleischer, S. & Packer, L.) vol. 53 27–35  
1576 (Academic Press, 1978).
- 1577 69. Meeusen, S., McCaffery, J. M. & Nunnari, J. Mitochondrial Fusion Intermediates Revealed  
1578 in Vitro. *Science* **305**, 1747–1752 (2004).
- 1579 70. Schlattner, U. *et al.* Dual function of mitochondrial Nm23-H4 protein in phosphotransfer and  
1580 intermembrane lipid transfer: a cardiolipin-dependent switch. *J Biol Chem* **288**, 111–121  
1581 (2013).
- 1582 71. MacNeil, L. T., Watson, E., Arda, H. E., Zhu, L. J. & Walhout, A. J. M. Diet-induced  
1583 developmental acceleration independent of TOR and insulin in *C. elegans*. *Cell* **153**, 240–  
1584 252 (2013).
- 1585 72. Qin, S. *et al.* Early-life vitamin B12 orchestrates lipid peroxidation to ensure reproductive  
1586 success via SBP-1/SREBP1 in *Caenorhabditis elegans*. *Cell Rep* **40**, 111381 (2022).
- 1587 73. Raghavan, R. *et al.* Maternal Multivitamin Intake, Plasma Folate and Vitamin B12 Levels  
1588 and Autism Spectrum Disorder Risk in Offspring. *Paediatr Perinat Epidemiol* **32**, 100–111  
1589 (2018).
- 1590 74. Molloy, A. M., Kirke, P. N., Brody, L. C., Scott, J. M. & Mills, J. L. Effects of folate and  
1591 vitamin B12 deficiencies during pregnancy on fetal, infant, and child development. *Food*  
1592 *Nutr Bull* **29**, S101-111; discussion S112-115 (2008).
- 1593 75. Green, R. *et al.* Vitamin B12 deficiency. *Nat Rev Dis Primers* **3**, 17040 (2017).



- 1594 76. Dokshin, G. A., Ghanta, K. S., Piscopo, K. M. & Mello, C. C. Robust Genome Editing with  
1595 Short Single-Stranded and Long, Partially Single-Stranded DNA Donors in *Caenorhabditis*  
1596 *elegans*. *Genetics* **210**, 781–787 (2018).
- 1597 77. Chen, X. *et al.* Dual sgRNA-directed gene knockout using CRISPR/Cas9 technology in  
1598 *Caenorhabditis elegans*. *Sci Rep* **4**, 7581 (2014).
- 1599 78. Rual, J.-F. *et al.* Toward Improving *Caenorhabditis elegans* Phenome Mapping With an  
1600 ORFeome-Based RNAi Library. *Genome Res* **14**, 2162–2168 (2004).
- 1601 79. Kamath, R. Genome-wide RNAi screening in *Caenorhabditis elegans*. *Methods* **30**, 313–  
1602 321 (2003).
- 1603 80. Neve, I. A. A. *et al.* *Escherichia coli* Metabolite Profiling Leads to the Development of an  
1604 RNA Interference Strain for *Caenorhabditis elegans*. *G3 (Bethesda)* **10**, 189–198 (2020).
- 1605 81. Gervaise, A. L. & Arur, S. Spatial and Temporal Analysis of Active ERK in the *C. elegans*  
1606 Germline. *J Vis Exp* 54901 (2016) doi:10.3791/54901.
- 1607 82. Ahier, A. *et al.* Affinity purification of cell-specific mitochondria from whole animals resolves  
1608 patterns of genetic mosaicism. *Nat Cell Biol* **20**, 352–360 (2018).
- 1609 83. Fung, D. K., Yang, J., Stevenson, D. M., Amador-Noguez, D. & Wang, J. D. Small Alarmone  
1610 Synthetase SasA Expression Leads to Concomitant Accumulation of pGpp, ppApp, and  
1611 AppppA in *Bacillus subtilis*. *Front Microbiol* **11**, 2083 (2020).
- 1612 84. Yang, J. *et al.* The nucleotide pGpp acts as a third alarmone in *Bacillus*, with functions  
1613 distinct from those of (p) ppGpp. *Nat Commun* **11**, 5388 (2020).
- 1614 85. Clasquin, M. F., Melamud, E. & Rabinowitz, J. D. LC-MS data processing with MAVEN: a  
1615 metabolomic analysis and visualization engine. *Curr Protoc Bioinformatics* **Chapter 14**,  
1616 Unit14.11 (2012).
- 1617
